# Supplementary material for: Impact of Different Exercise Modalities on the Human Gut Microbiome
Source: MDPI journal article supplement (doi:10.3390/sports9020014), 2021-01-21

| project | distance                 | performance metric | Spearman rho | Spearman p-value |
|---------|--------------------------|--------------------|--------------|------------------|
| exmp1   | unweighted UniFrac       |                    |              |                  |
|         | distance (week 1 to 5.0) | RER-change         | 0.223648123  | 0.262118472      |
| exmp1   | unweighted UniFrac       |                    |              |                  |
|         | distance (week 1 to 5.0) | VO2max-change      | 0.384004884  | 0.047985996      |
| exmp1   | weighted UniFrac         |                    |              |                  |
|         | distance (week 1 to 5.0) | RER-change         | 0.022609237  | 0.910874146      |
| exmp1   | weighted UniFrac         |                    |              |                  |
|         | distance (week 1 to 5.0) | VO2max-change      | 0.357753358  | 0.066928415      |
| exmp1   | Bray-Curtis distance     |                    |              |                  |
|         | (week 1 to 5.0)          | RER-change         | 0.141154963  | 0.482501569      |
| exmp1   | Bray-Curtis distance     |                    |              |                  |
|         | (week 1 to 5.0)          | VO2max-change      | 0.36996337   | 0.057506101      |
| exmp1   | Jaccard distance (week 1 |                    |              |                  |
|         | to 5.0)                  | RER-change         | 0.048579305  | 0.809847438      |
| exmp1   | Jaccard distance (week 1 |                    |              |                  |
|         | to 5.0)                  | VO2max-change      | 0.371794872  | 0.056186897      |

sample size   Spearman q-value

27        0.703553346

27        0.325244093

27        0.963842003

27        0.332882987

27        0.861411527

27        0.332882987

27        0.963842003

27        0.332882987

| project | distance                                       | performance metric | Spearman rho | Spearman p-value |
|---------|------------------------------------------------|--------------------|--------------|------------------|
| exmp1   | unweighted UniFrac distance<br>(week 1 to 6.0) | RER-change         | -0.1964409   | 0.336145609      |
| exmp1   | unweighted UniFrac distance<br>(week 1 to 6.0) | VO2max-change      | 0.056410256  | 0.784308648      |
| exmp1   | weighted UniFrac distance<br>(week 1 to 6.0)   | RER-change         | -0.17830263  | 0.383498543      |
| exmp1   | weighted UniFrac distance<br>(week 1 to 6.0)   | VO2max-change      | -0.17538462  | 0.391456855      |
| exmp1   | Bray-Curtis distance (week 1<br>to 6.0)        | RER-change         | -0.07357978  | 0.720928979      |
| exmp1   | Bray-Curtis distance (week 1<br>to 6.0)        | VO2max-change      | -0.18837607  | 0.356747017      |
| exmp1   | Jaccard distance (week 1 to<br>6.0)            | RER-change         | -0.12183442  | 0.553248967      |
| exmp1   | Jaccard distance (week 1 to<br>6.0)            | VO2max-change      | 0.016752137  | 0.935263896      |

Spearman q-  
sample size value

26 0.96227905

26 0.97826577

26 0.96227905

26 0.96227905

26 0.97826577

26 0.96227905

26 0.96227905

26 0.97826577

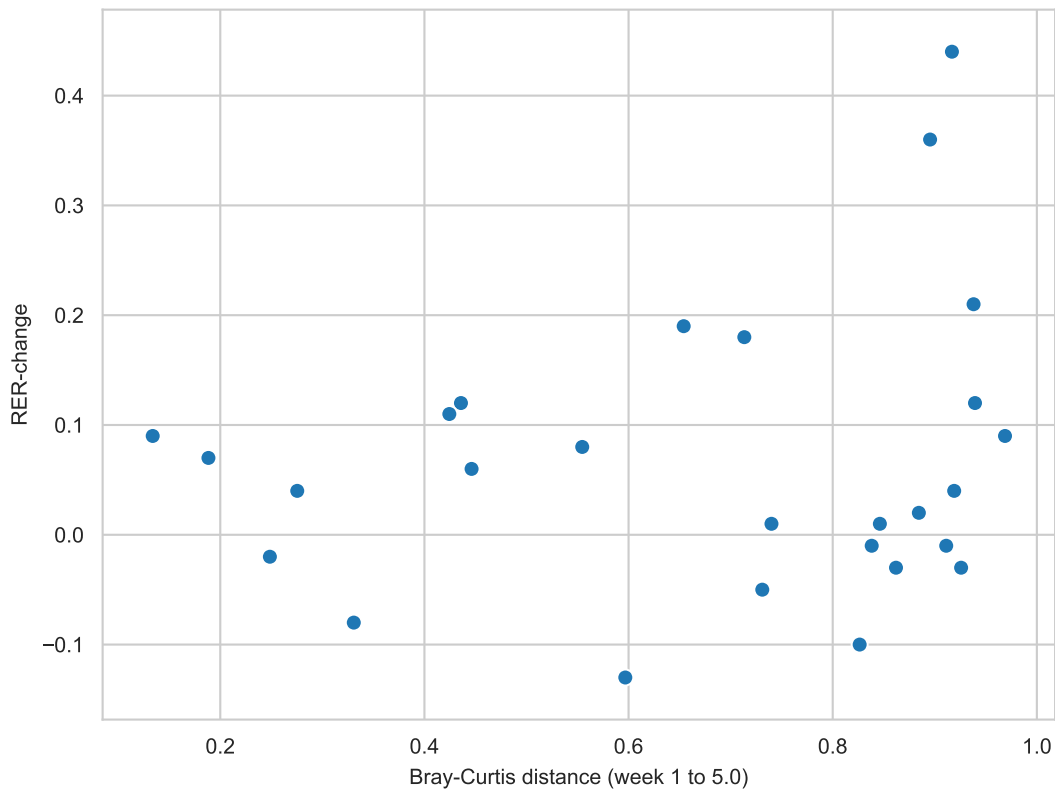

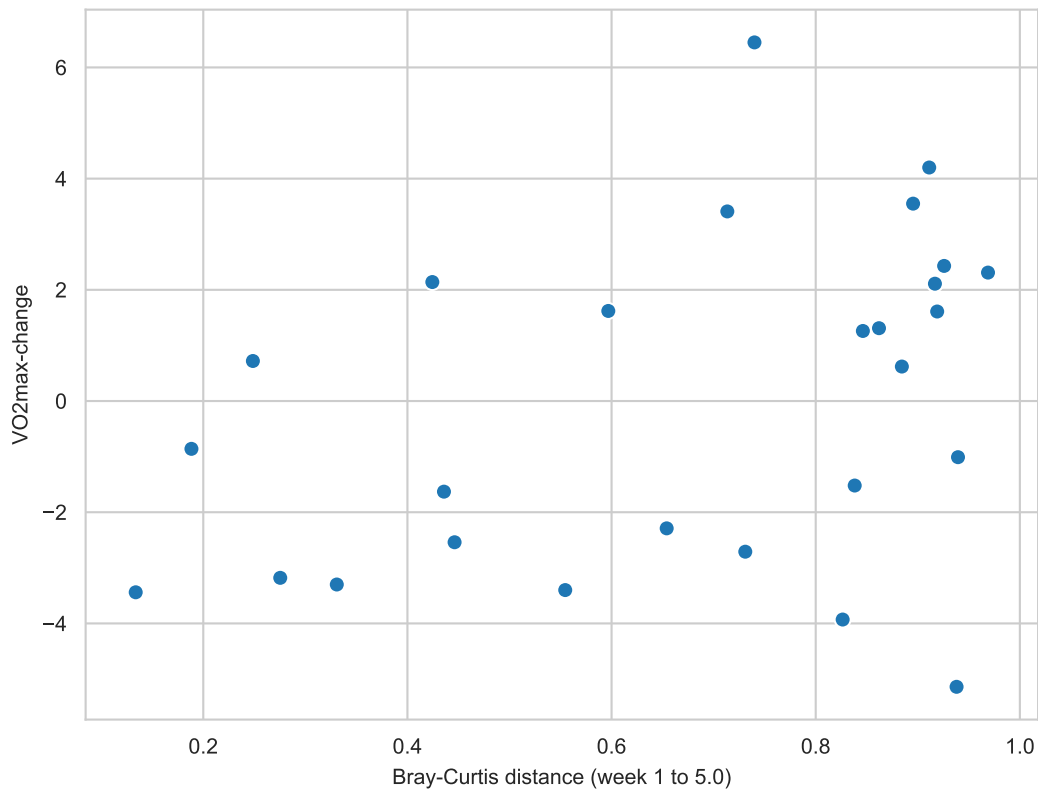

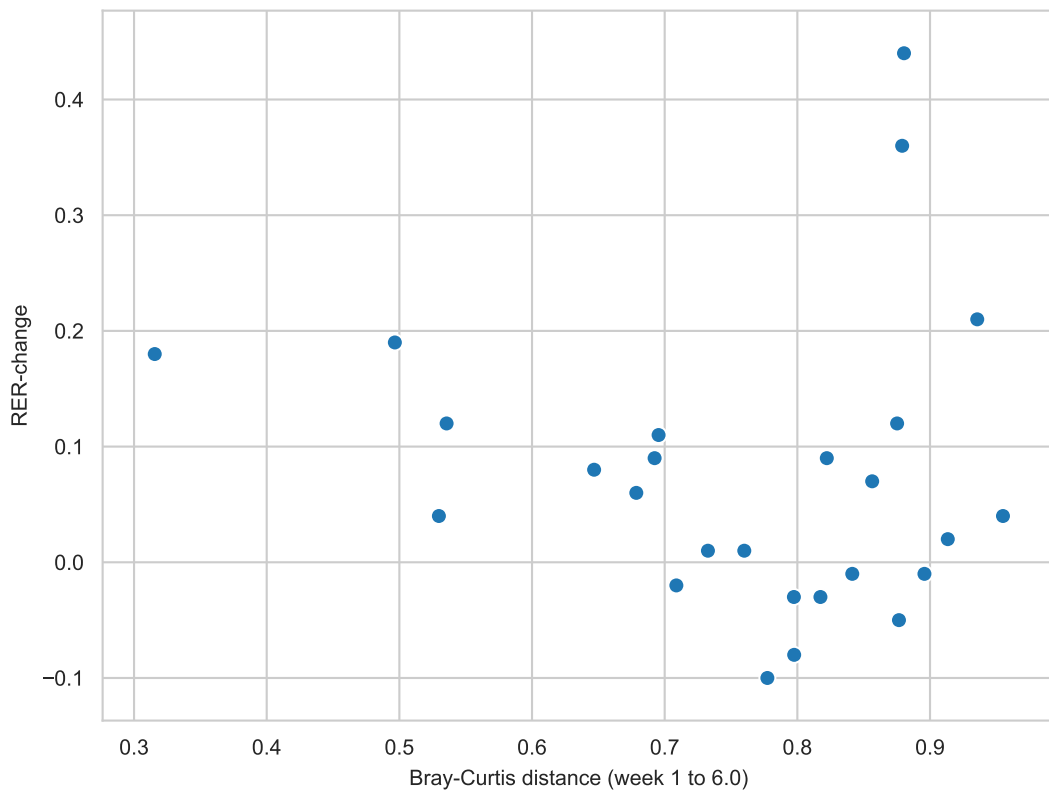

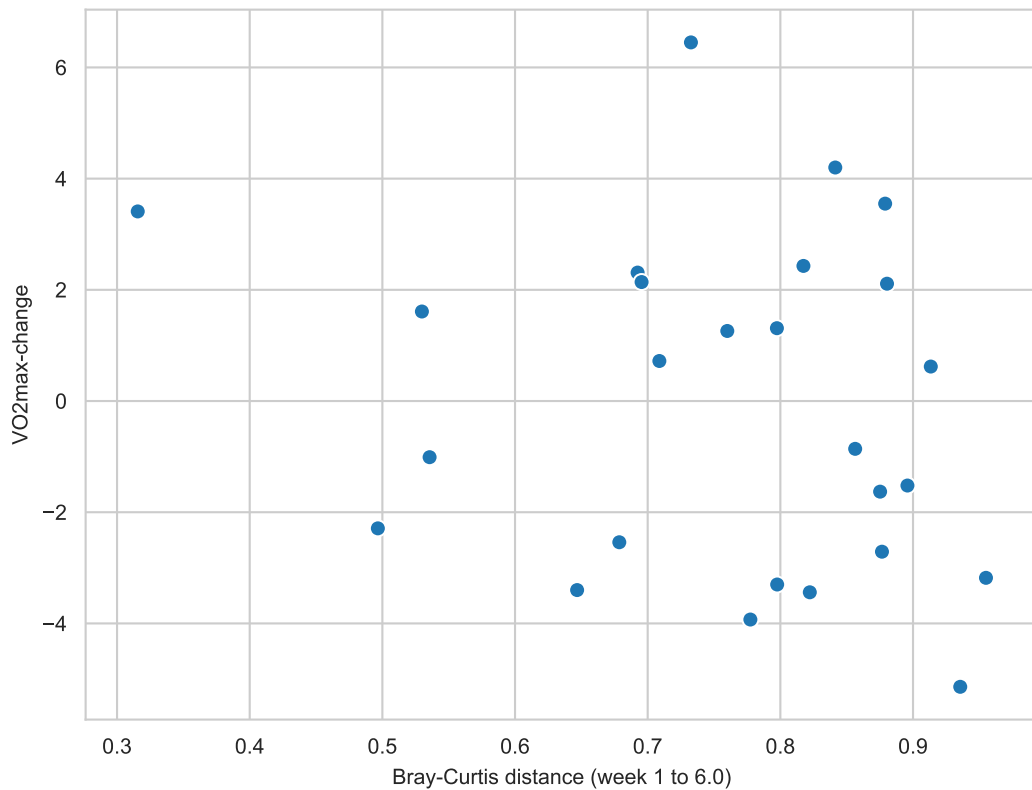



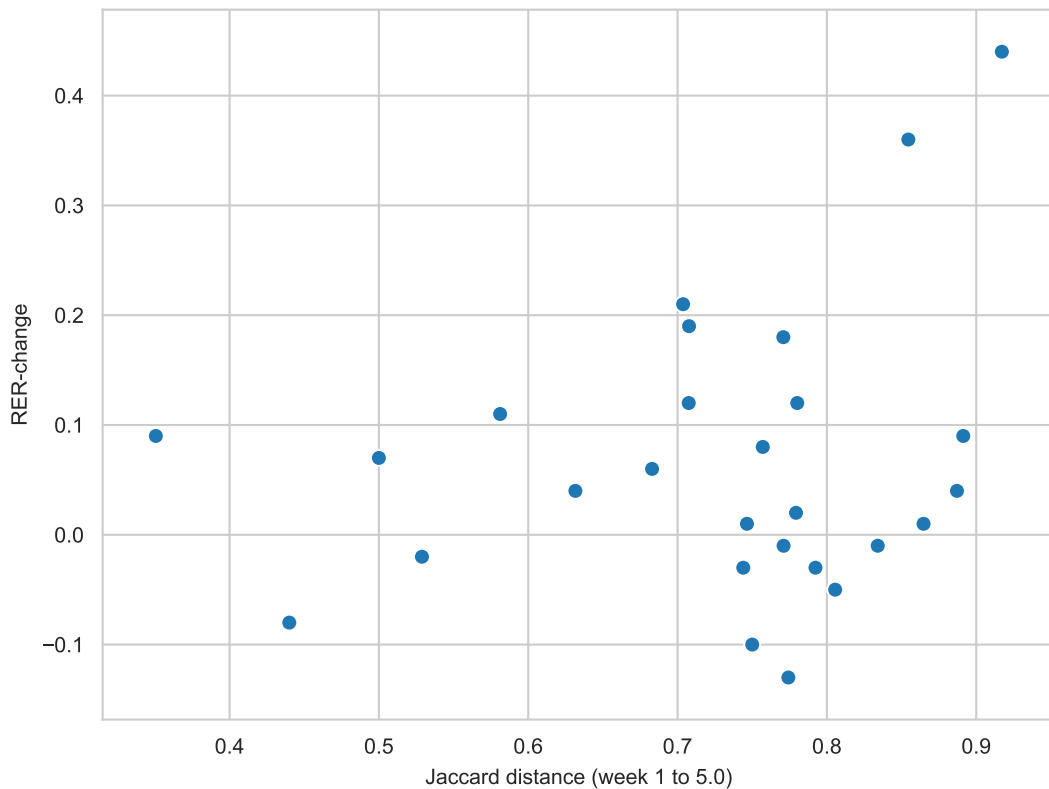

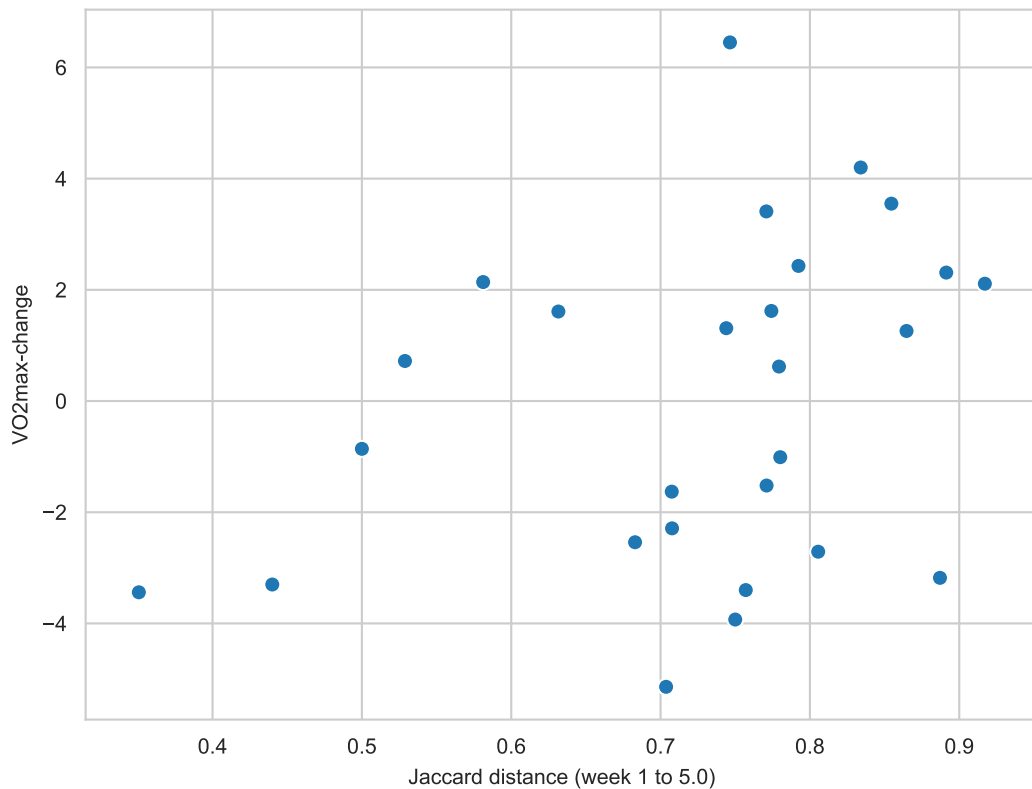

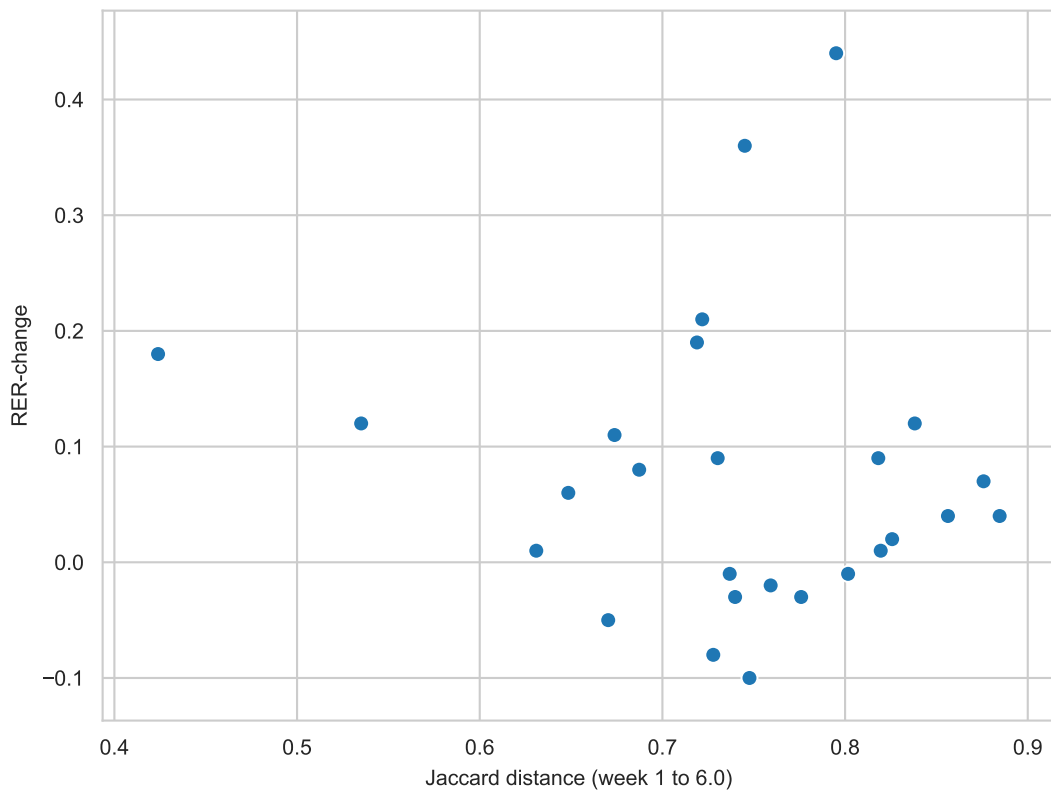

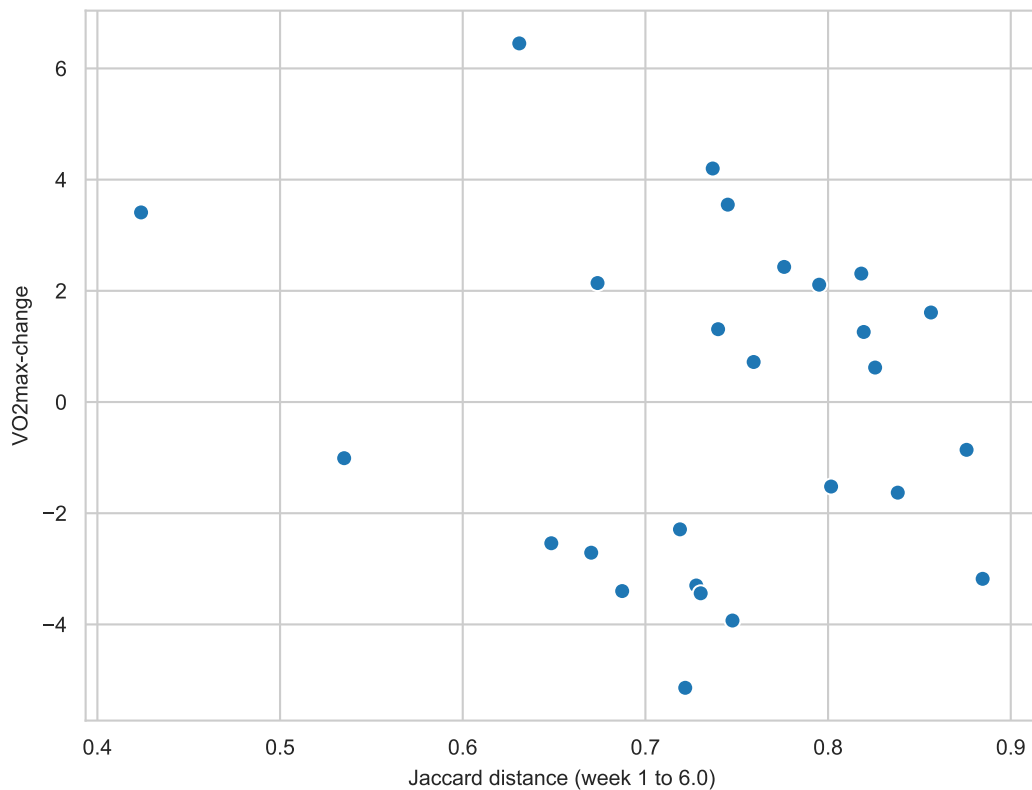

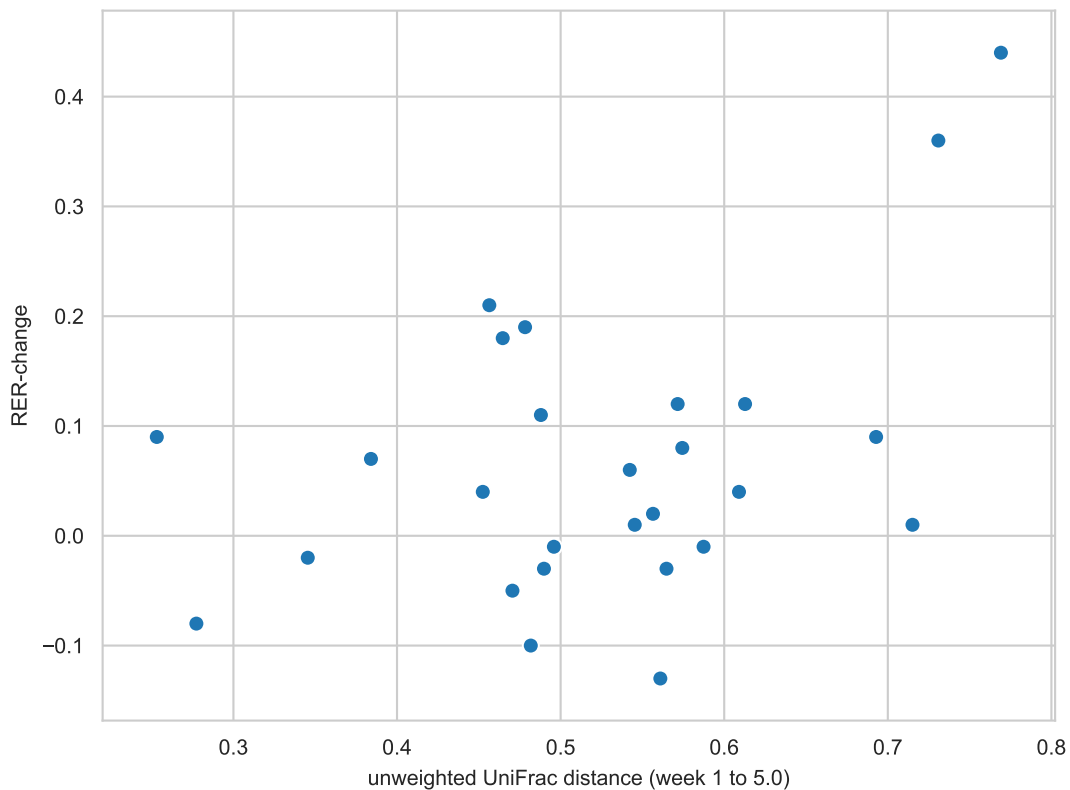

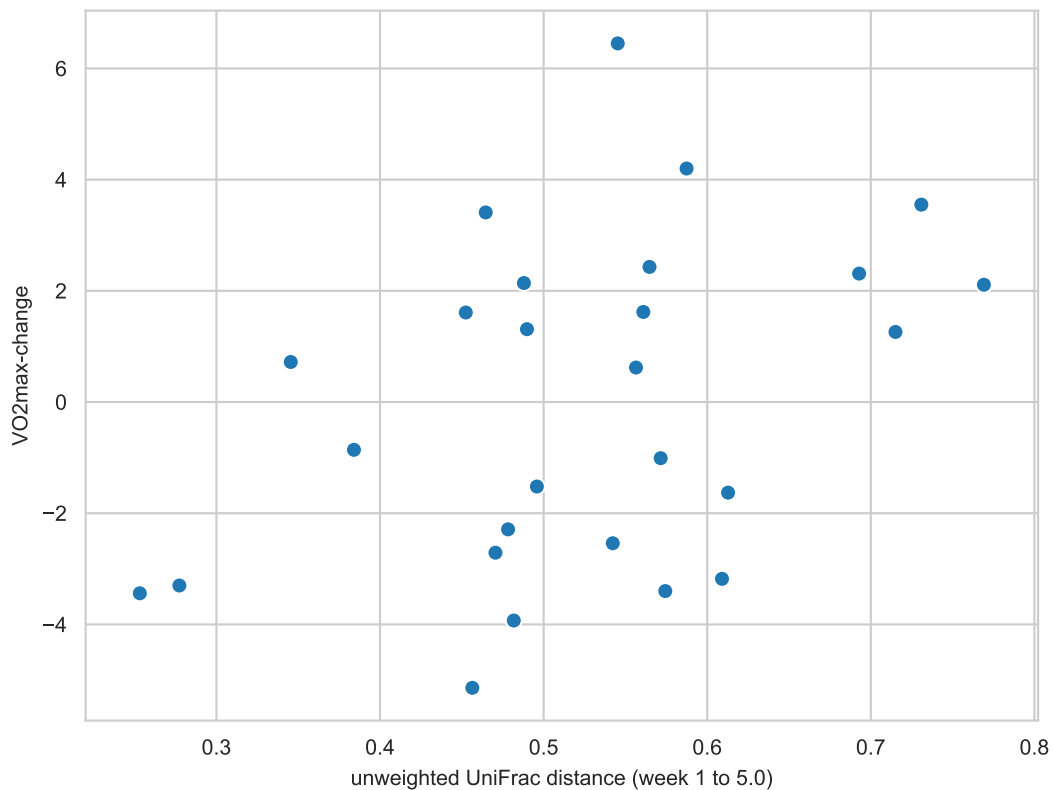

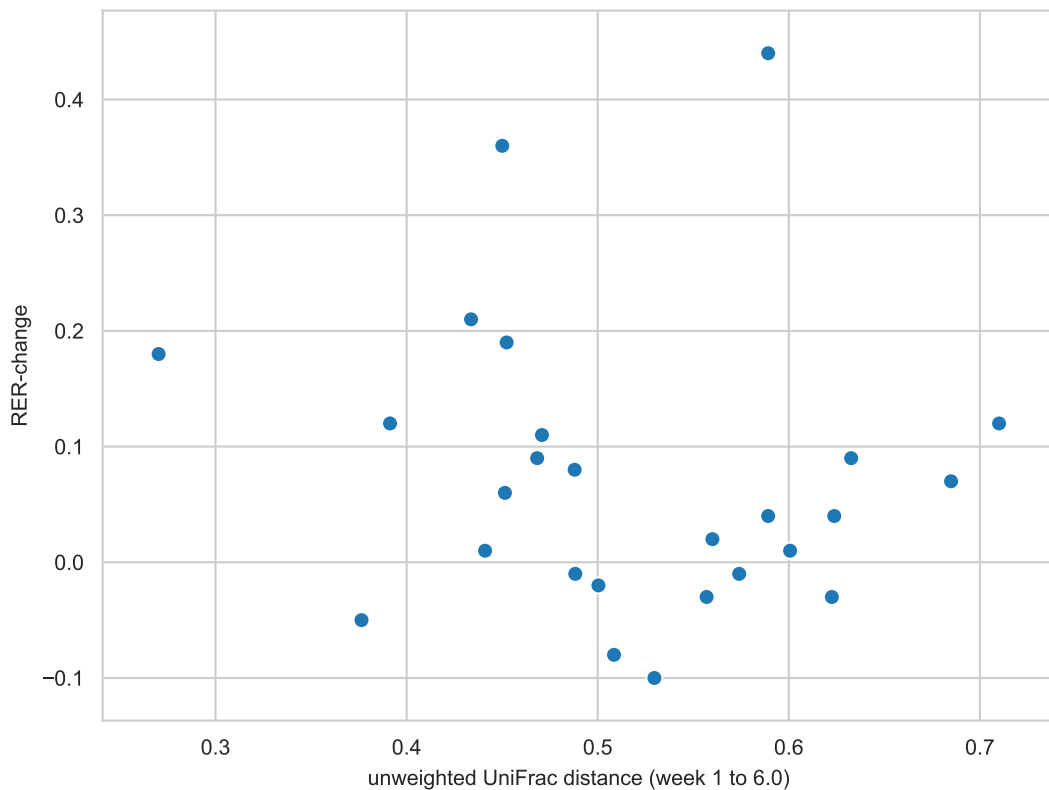

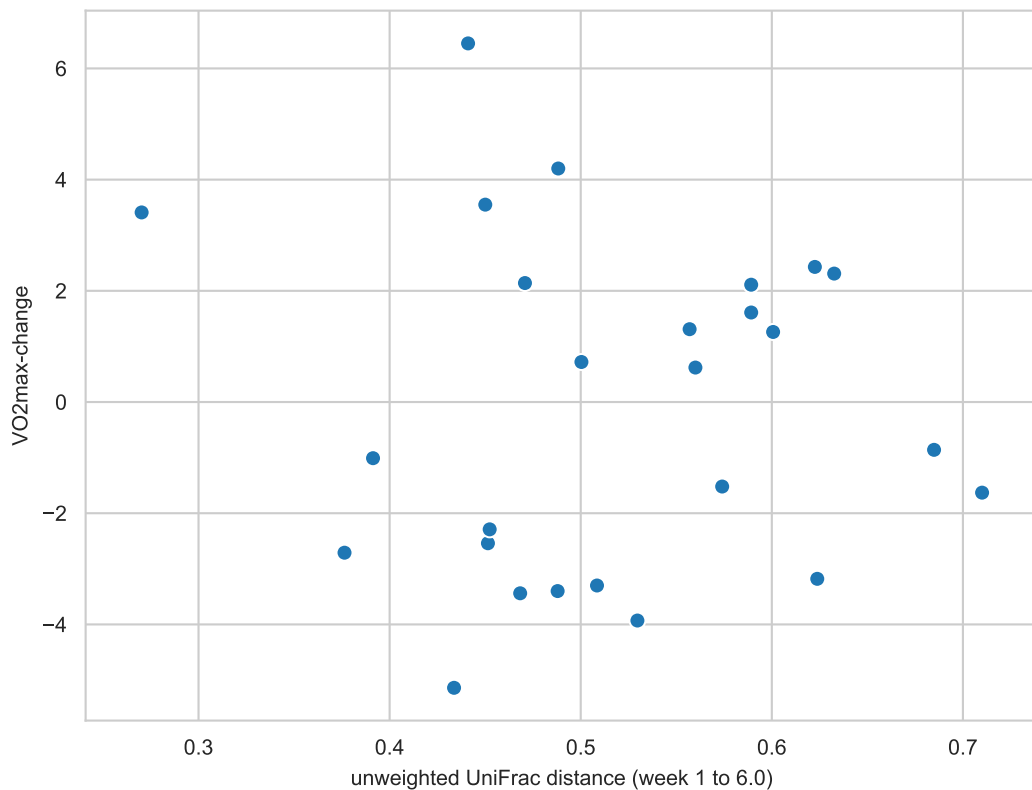



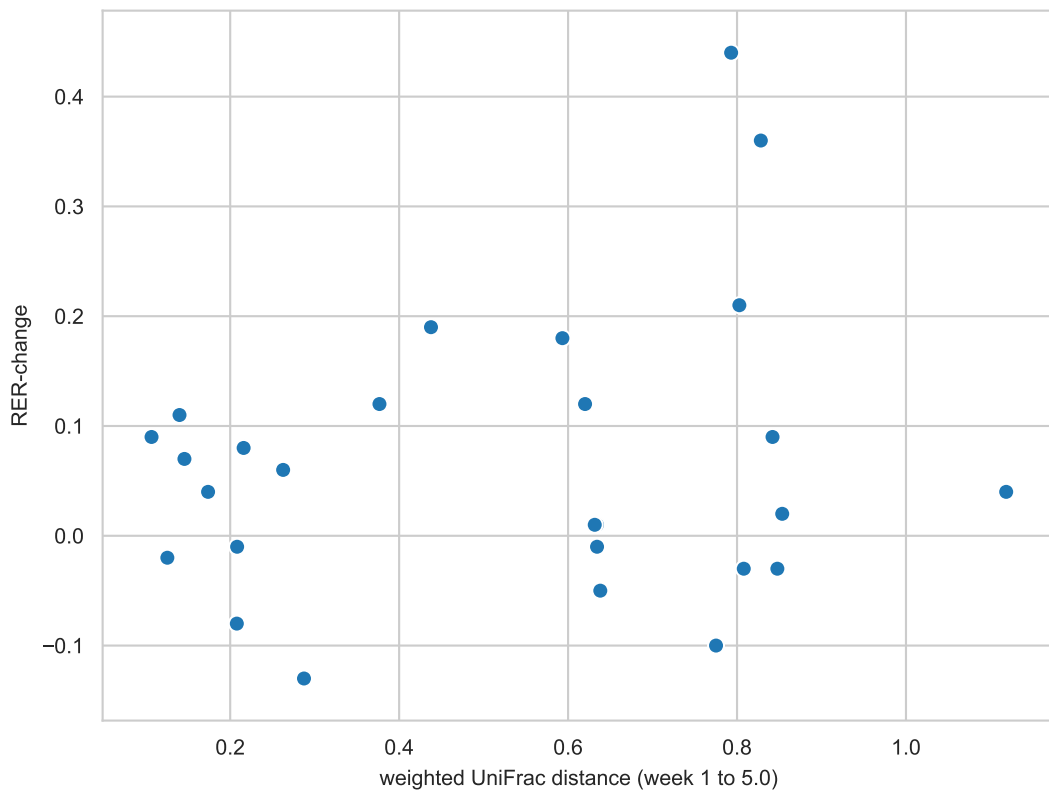

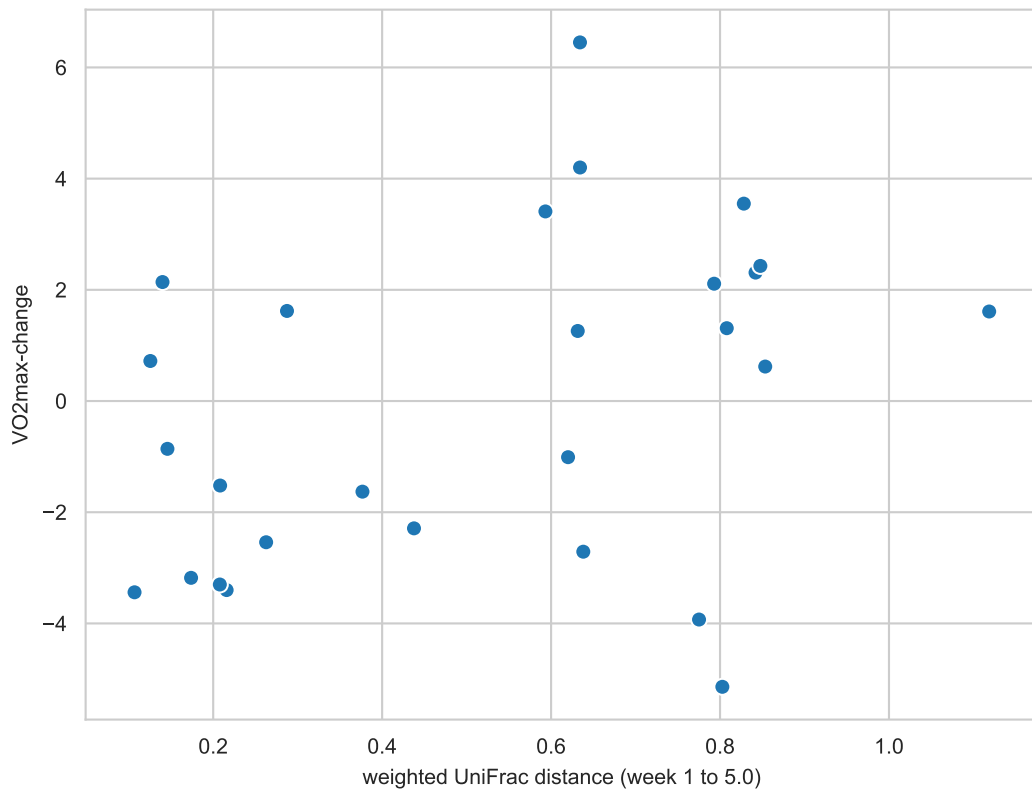

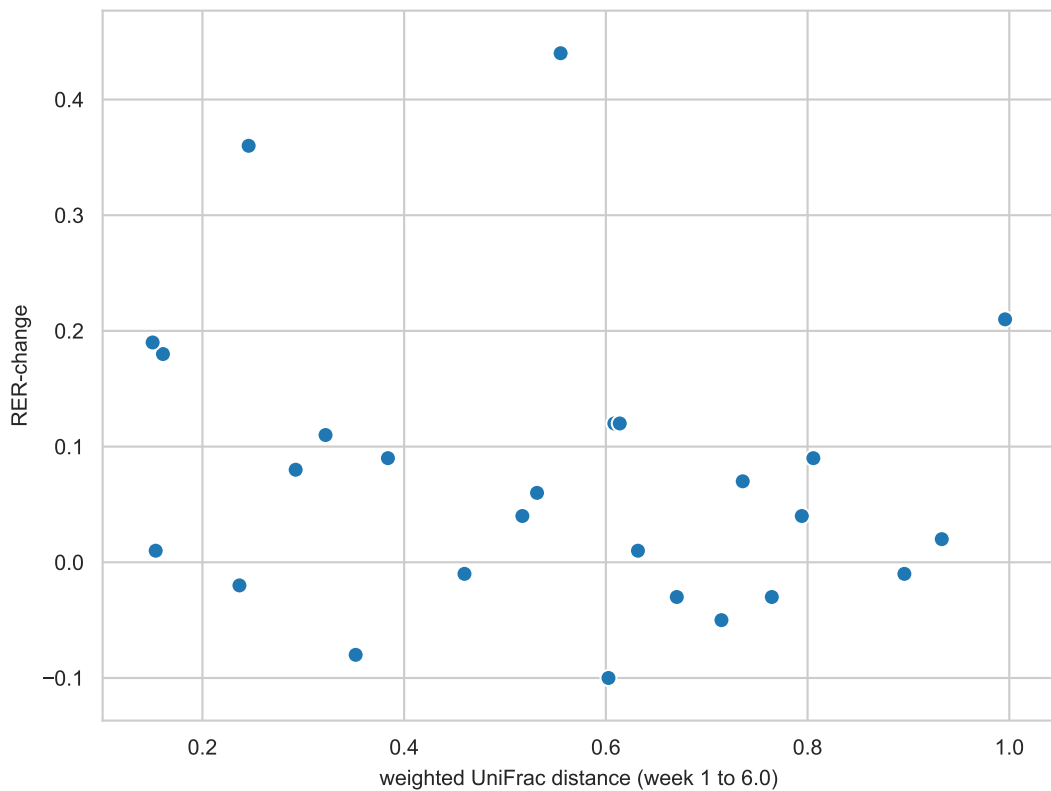

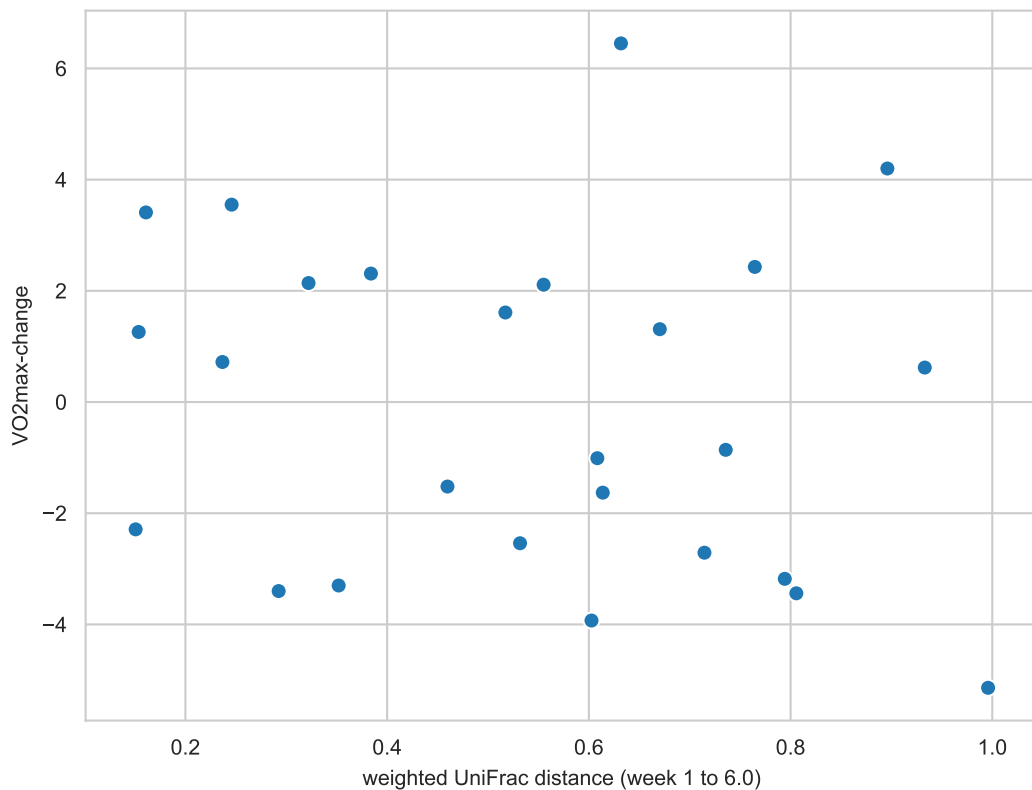

| project | distance                                       | performance metric | Spearman rho |
|---------|------------------------------------------------|--------------------|--------------|
| exmp2   | unweighted UniFrac distance<br>(week 1 to 5.0) | bench-press-change | 0.197446571  |
| exmp2   | unweighted UniFrac distance<br>(week 1 to 5.0) | row-change         | -0.140413728 |
| exmp2   | unweighted UniFrac distance<br>(week 1 to 5.0) | 3RM-squat-change   | 0.118600728  |
| exmp2   | weighted UniFrac distance<br>(week 1 to 5.0)   | bench-press-change | 0.092141733  |
| exmp2   | weighted UniFrac distance<br>(week 1 to 5.0)   | row-change         | 0.258944796  |
| exmp2   | weighted UniFrac distance<br>(week 1 to 5.0)   | 3RM-squat-change   | 0.264156168  |
| exmp2   | Bray-Curtis distance (week 1 to<br>5.0)        | bench-press-change | 0.242577216  |
| exmp2   | Bray-Curtis distance (week 1 to<br>5.0)        | row-change         | 0.047412428  |
| exmp2   | Bray-Curtis distance (week 1 to<br>5.0)        | 3RM-squat-change   | 0.271344091  |
| exmp2   | Jaccard distance (week 1 to 5.0)               | bench-press-change | 0.188044354  |
| exmp2   | Jaccard distance (week 1 to 5.0)               | row-change         | -0.072942196 |
| exmp2   | Jaccard distance (week 1 to 5.0)               | 3RM-squat-change   | 0.136570536  |

| Spearman p-value | sample size | Spearman q-value |
|------------------|-------------|------------------|
| 0.480587596      | 15          | 0.99470216       |
| 0.617690452      | 15          | 0.99687758       |
| 0.673769414      | 15          | 0.99687758       |
| 0.743970749      | 15          | 0.99687758       |
| 0.351379275      | 15          | 0.9915111        |
| 0.341419303      | 15          | 0.9915111        |
| 0.383694033      | 15          | 0.9915111        |
| 0.866748467      | 15          | 0.99687758       |
| 0.327945833      | 15          | 0.9915111        |
| 0.502133114      | 15          | 0.99470216       |
| 0.796145426      | 15          | 0.99687758       |
| 0.627440321      | 15          | 0.99687758       |

| project | distance                                    | performance metric | Spearman rho |
|---------|---------------------------------------------|--------------------|--------------|
| exmp2   | unweighted UniFrac distance (week 1 to 6.0) | bench-press-change | 0.166426567  |
| exmp2   | unweighted UniFrac distance (week 1 to 6.0) | row-change         | 0.119544142  |
| exmp2   | unweighted UniFrac distance (week 1 to 6.0) | 3RM-squat-change   | 0.183632363  |
| exmp2   | weighted UniFrac distance (week 1 to 6.0)   | bench-press-change | 0.178146748  |
| exmp2   | weighted UniFrac distance (week 1 to 6.0)   | row-change         | 0.036088797  |
| exmp2   | weighted UniFrac distance (week 1 to 6.0)   | 3RM-squat-change   | 0.429212994  |
| exmp2   | Bray-Curtis distance (week 1 to 6.0)        | bench-press-change | 0.407862291  |
| exmp2   | Bray-Curtis distance (week 1 to 6.0)        | row-change         | -0.045110997 |
| exmp2   | Bray-Curtis distance (week 1 to 6.0)        | 3RM-squat-change   | 0.418150803  |
| exmp2   | Jaccard distance (week 1 to 6.0)            | bench-press-change | 0.24377976   |
| exmp2   | Jaccard distance (week 1 to 6.0)            | row-change         | 0.166910688  |
| exmp2   | Jaccard distance (week 1 to 6.0)            | 3RM-squat-change   | 0.298679145  |

| Spearman p-value | sample size | Spearman q-value |
|------------------|-------------|------------------|
| 0.569597804      | 14          | 0.99491378       |
| 0.683967172      | 14          | 0.99491378       |
| 0.52973547       | 14          | 0.99491378       |
| 0.542309464      | 14          | 0.99491378       |
| 0.902518227      | 14          | 0.99491378       |
| 0.125645364      | 14          | 0.80035823       |
| 0.147714619      | 14          | 0.80169728       |
| 0.878296292      | 14          | 0.99491378       |
| 0.136781404      | 14          | 0.80169728       |
| 0.400976013      | 14          | 0.98342118       |
| 0.56845946       | 14          | 0.99491378       |
| 0.299603591      | 14          | 0.95944026       |



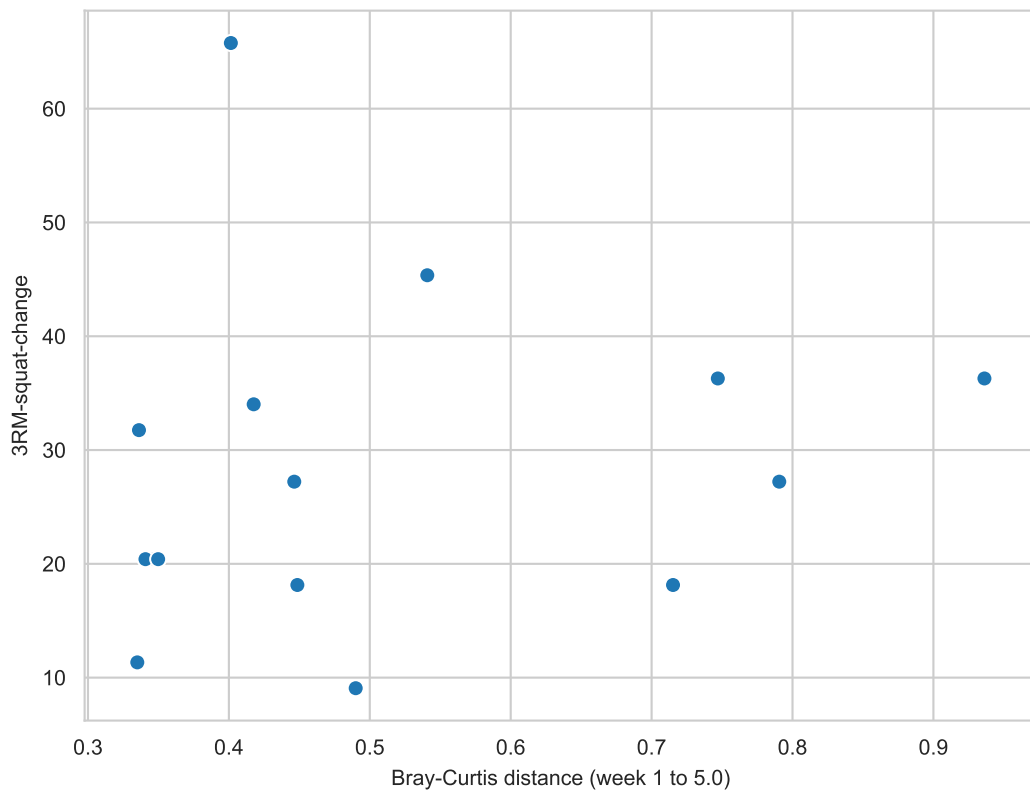

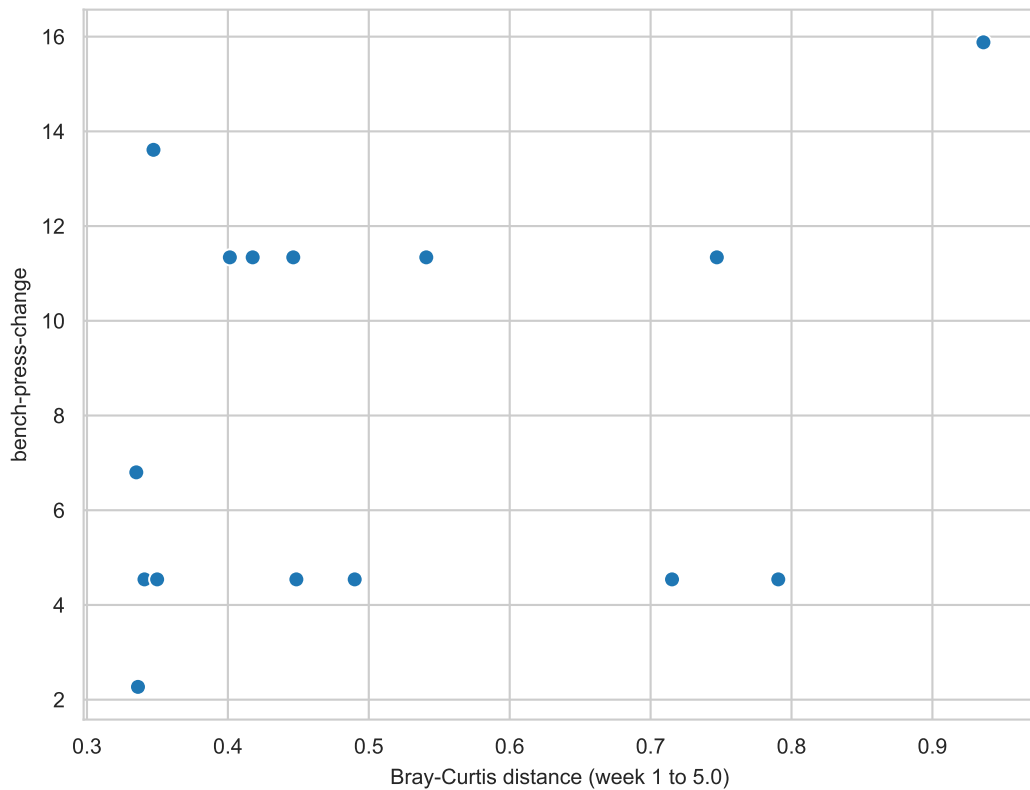

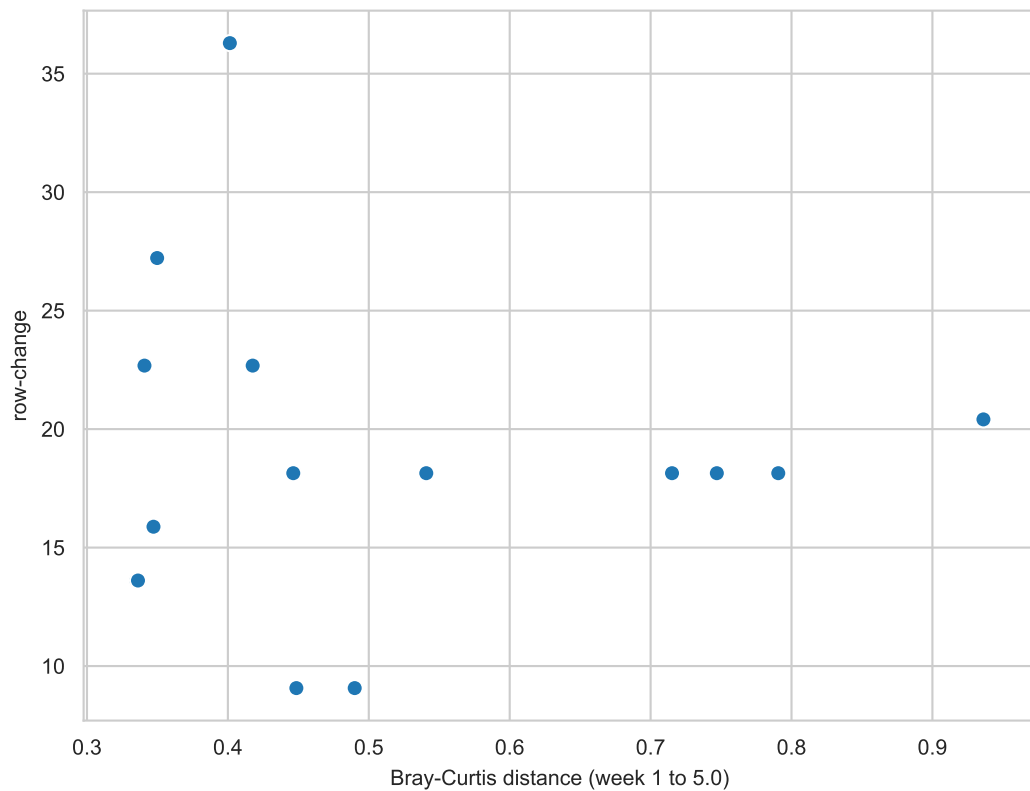

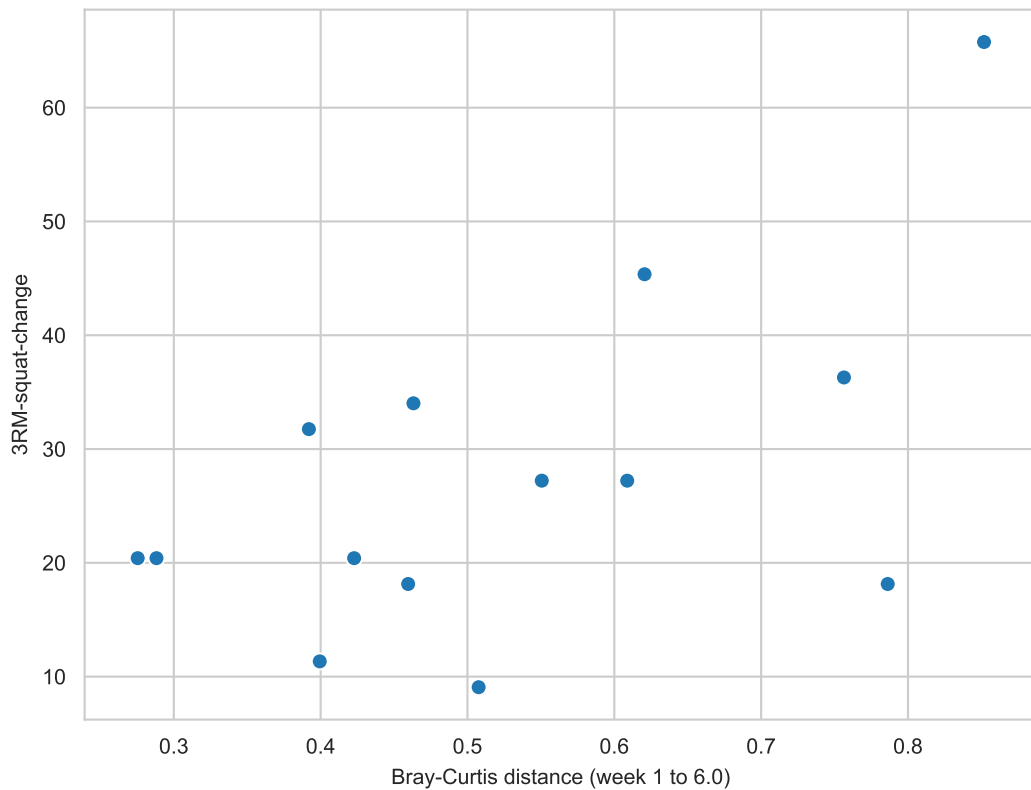

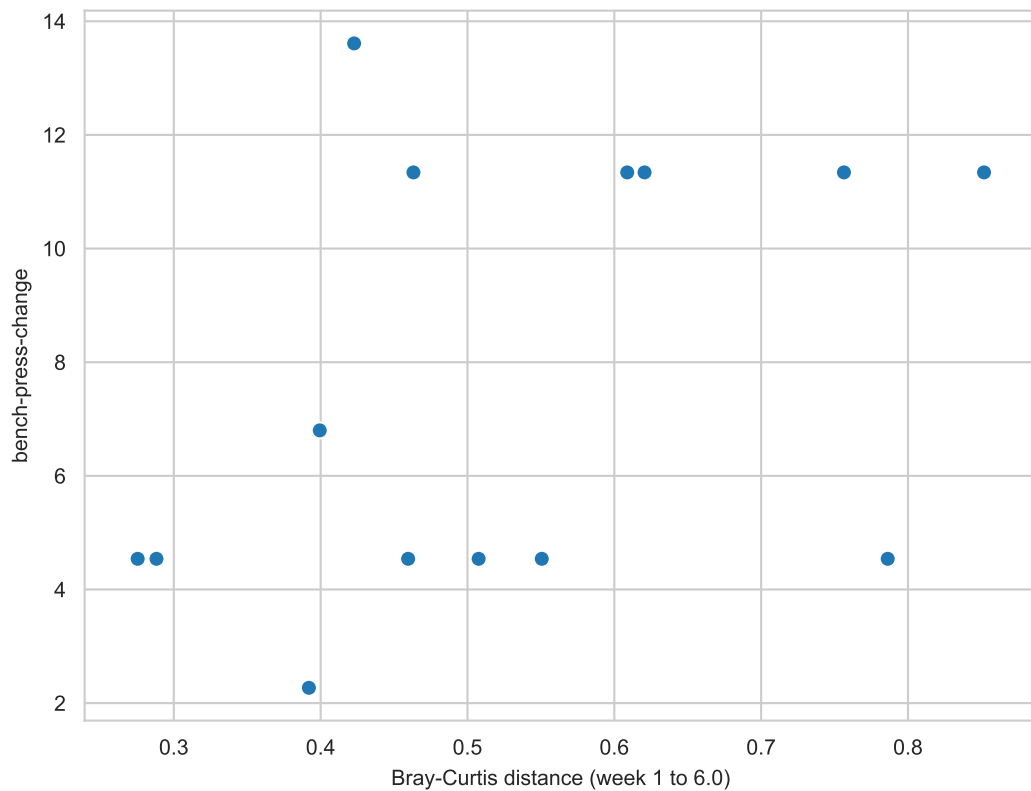

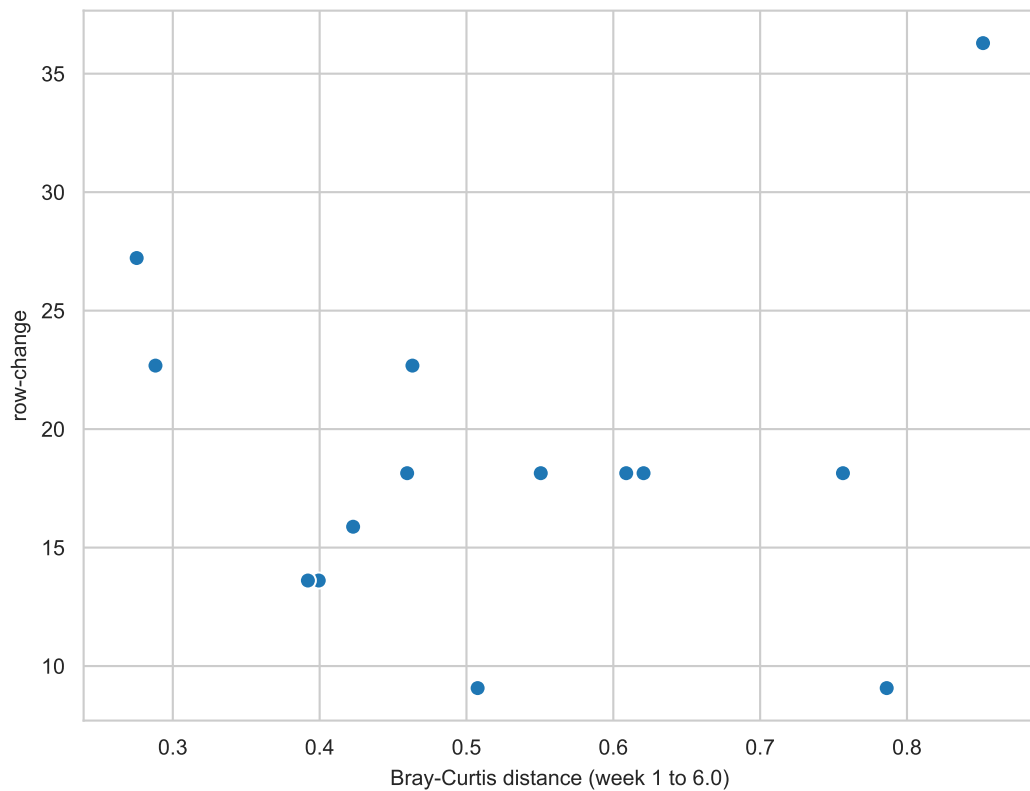

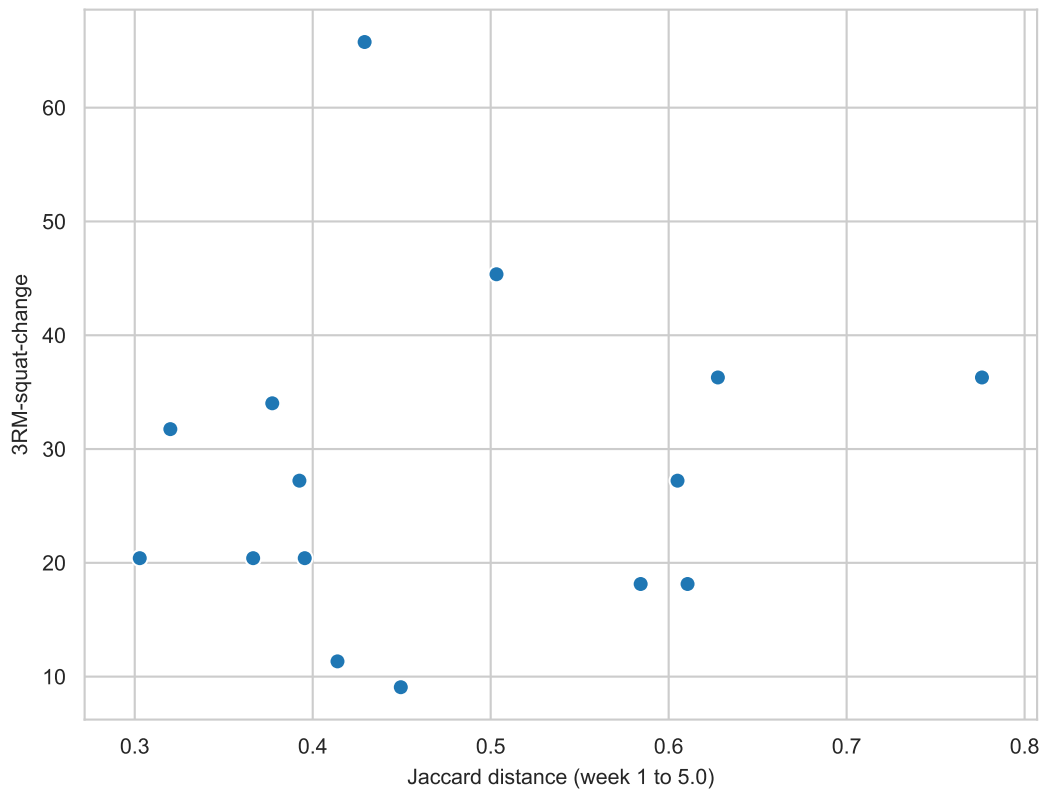

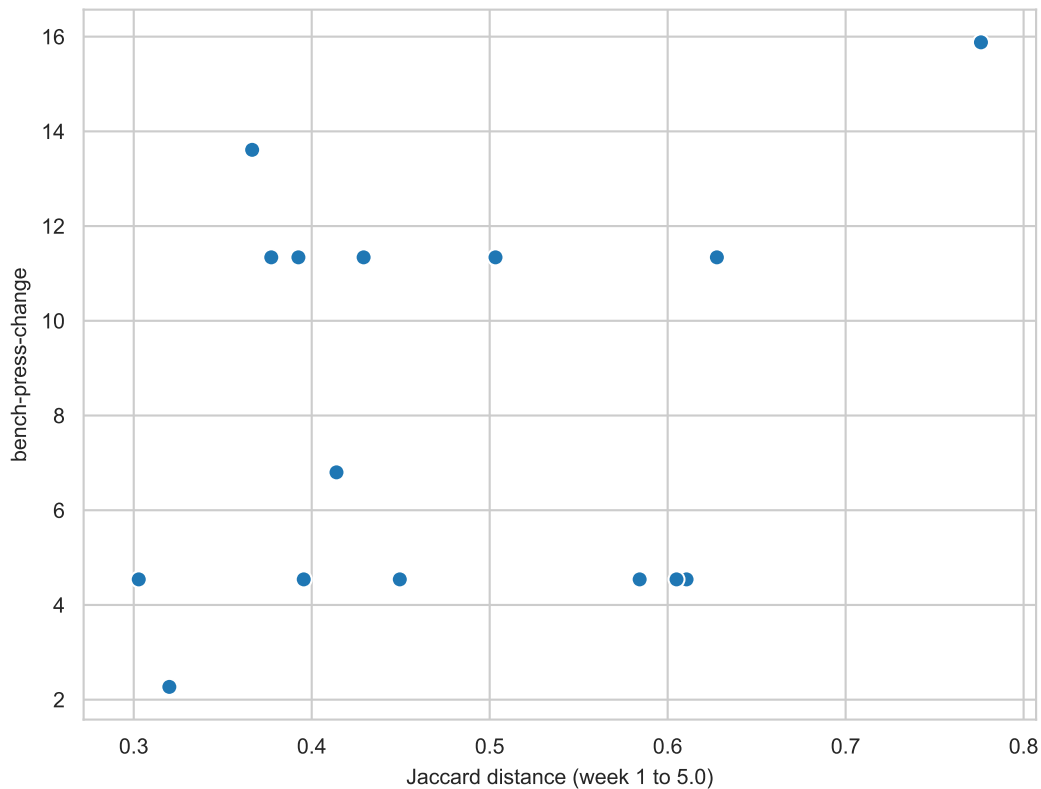



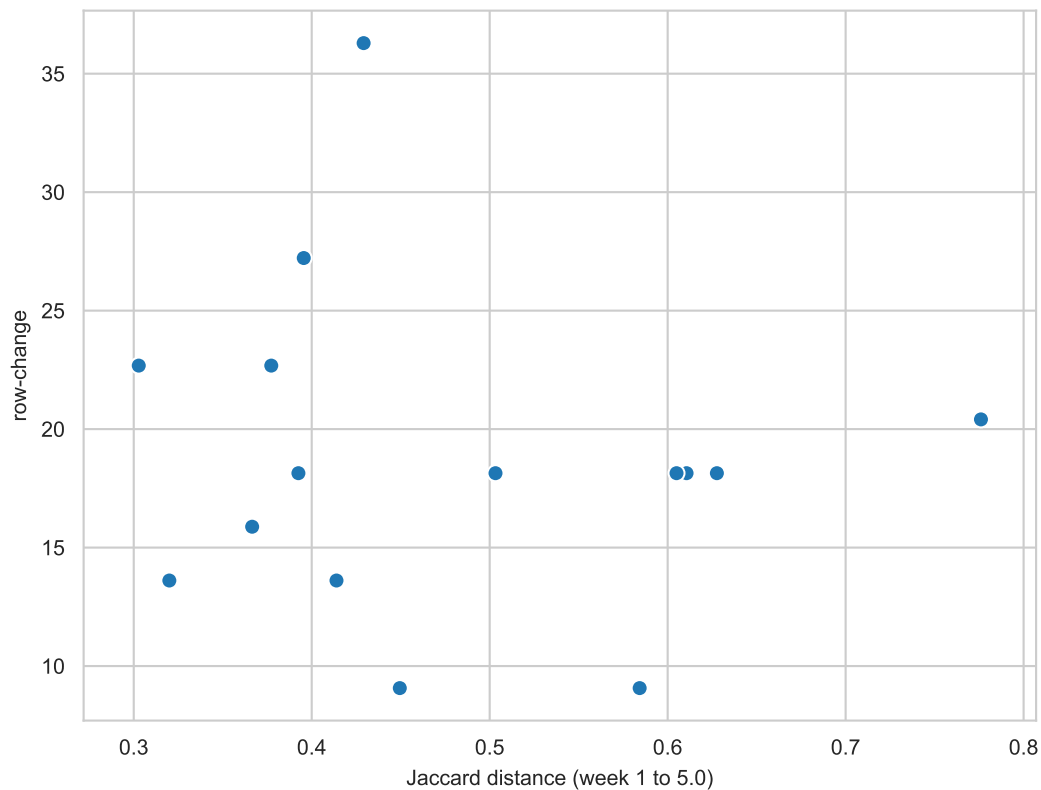

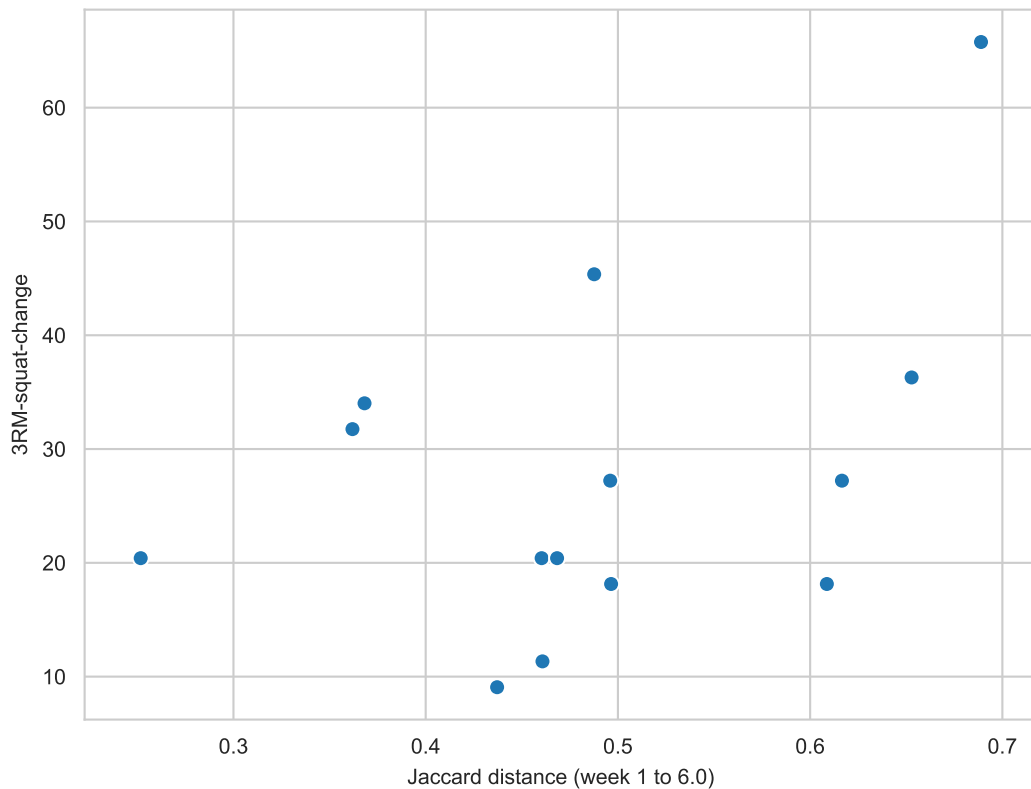

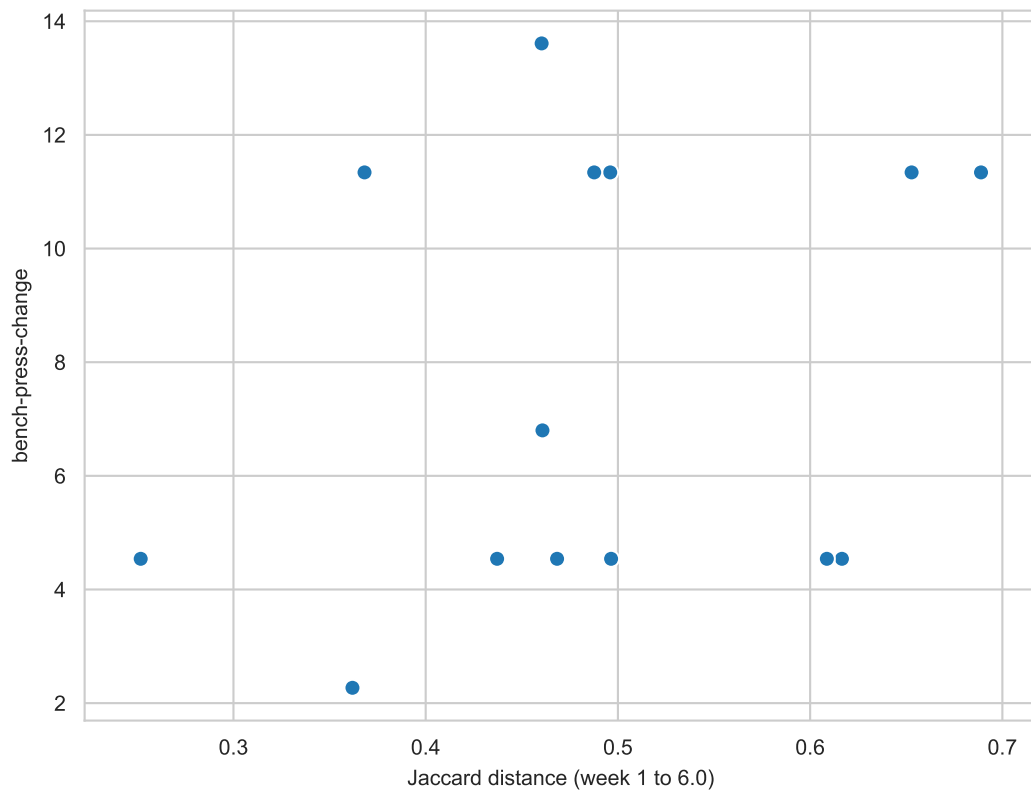

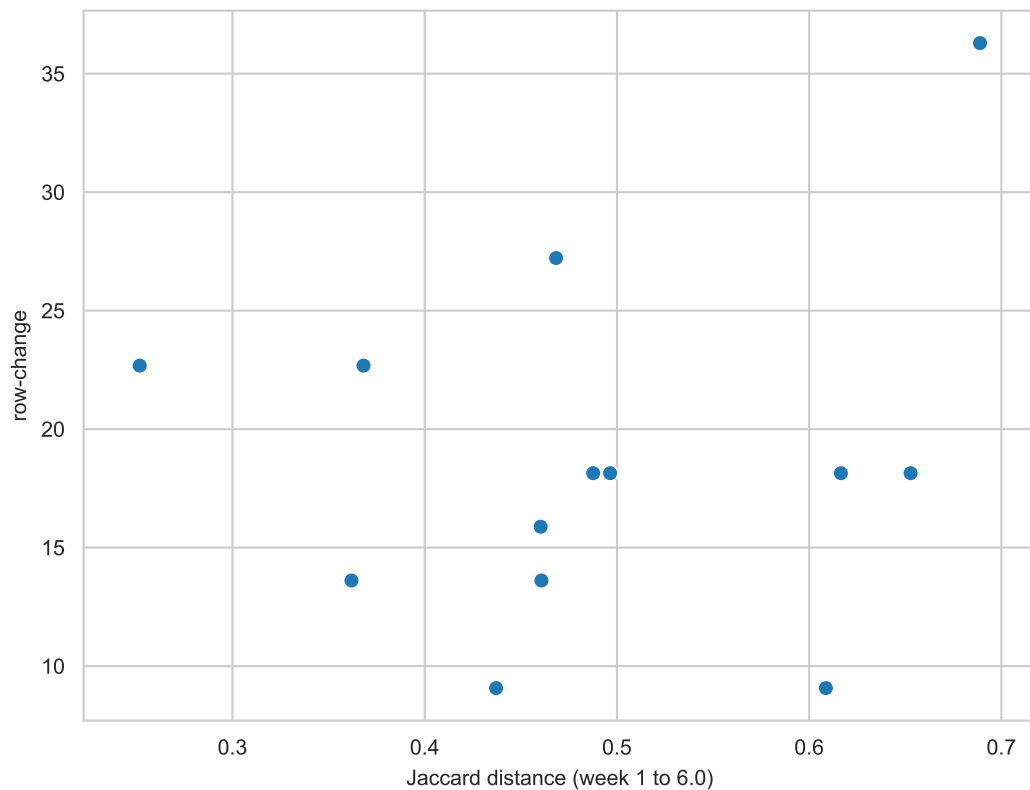

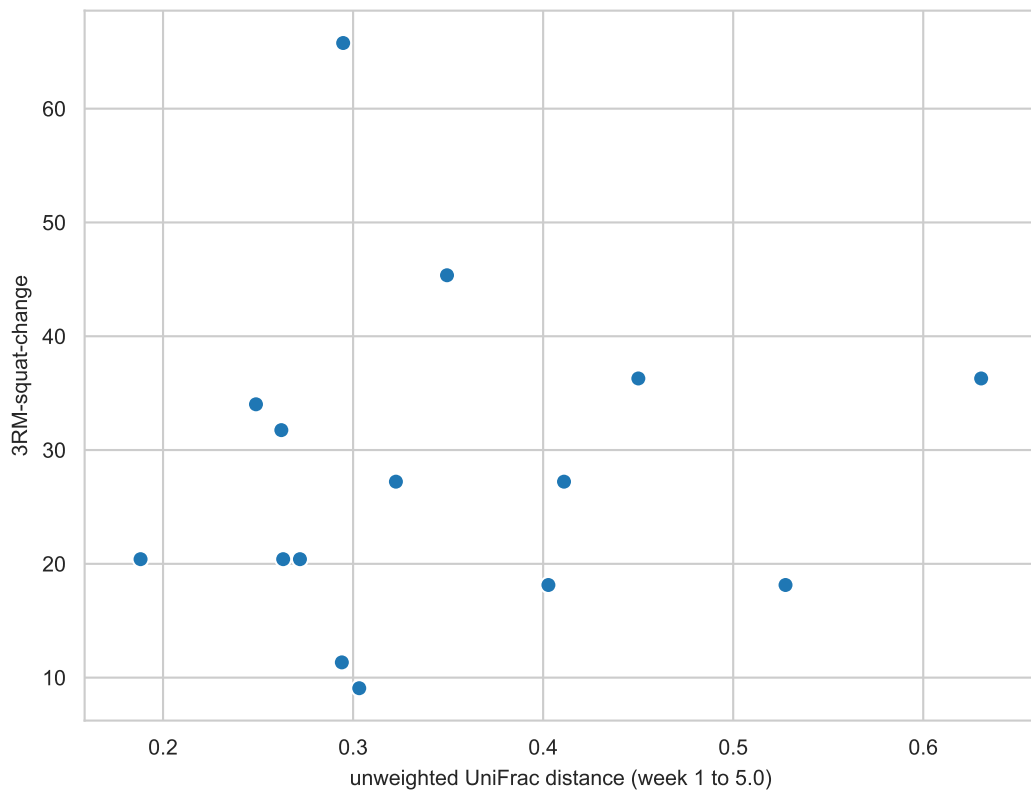

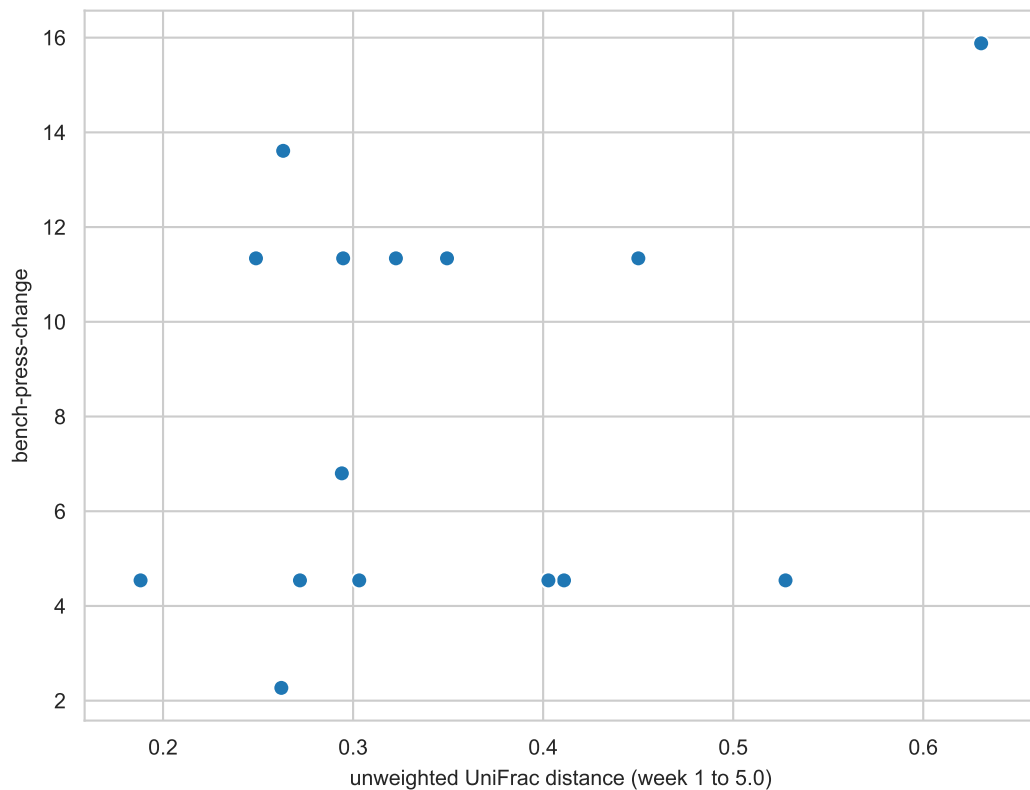

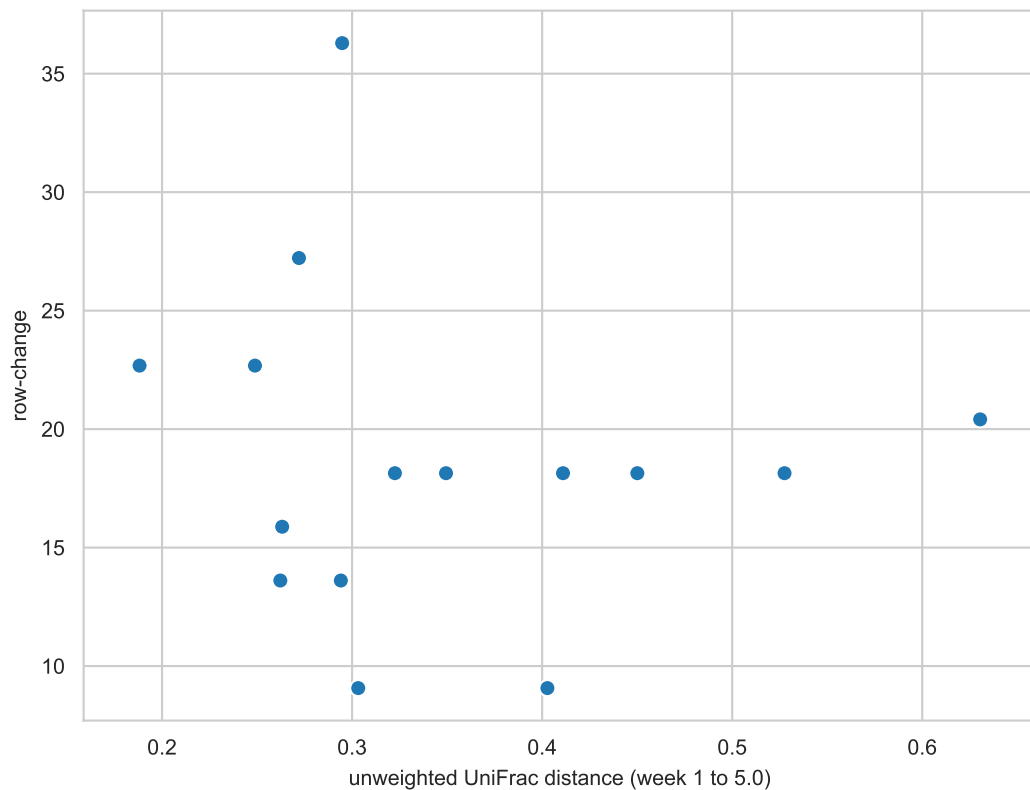

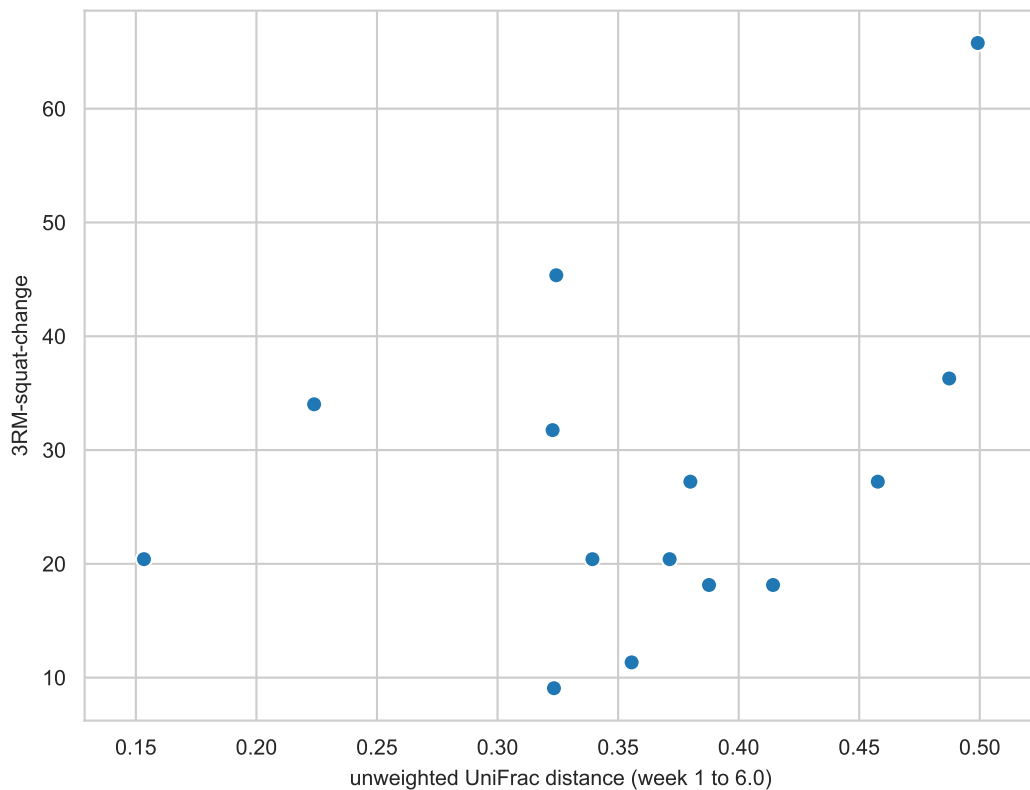



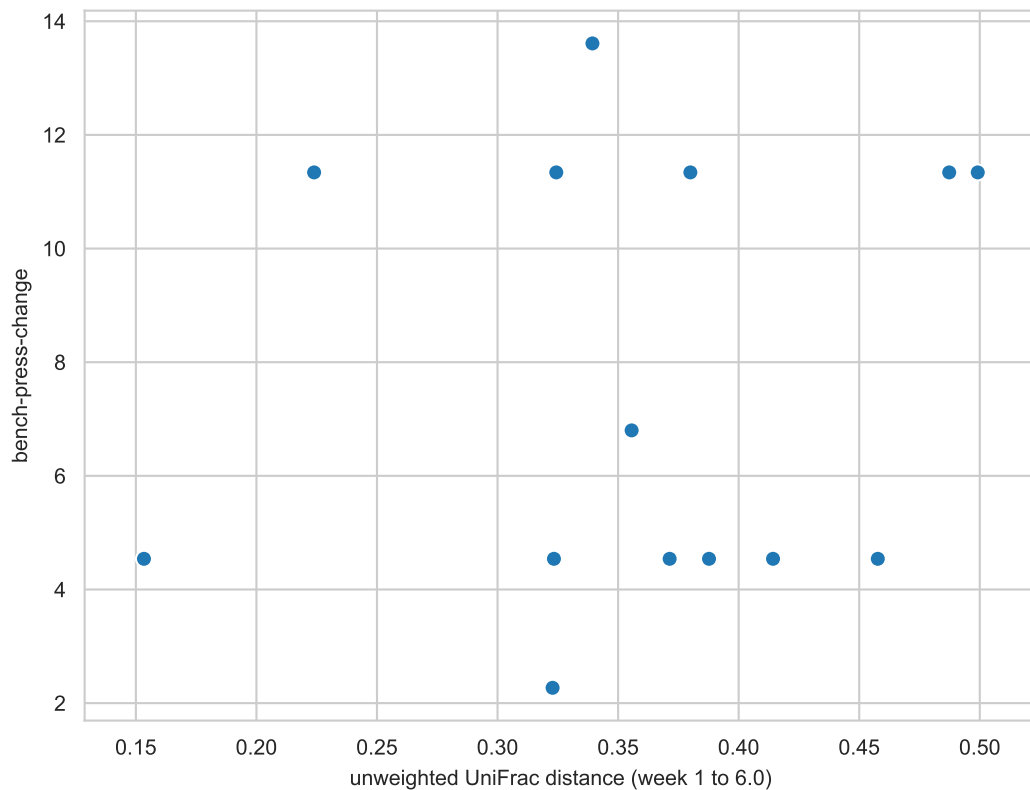

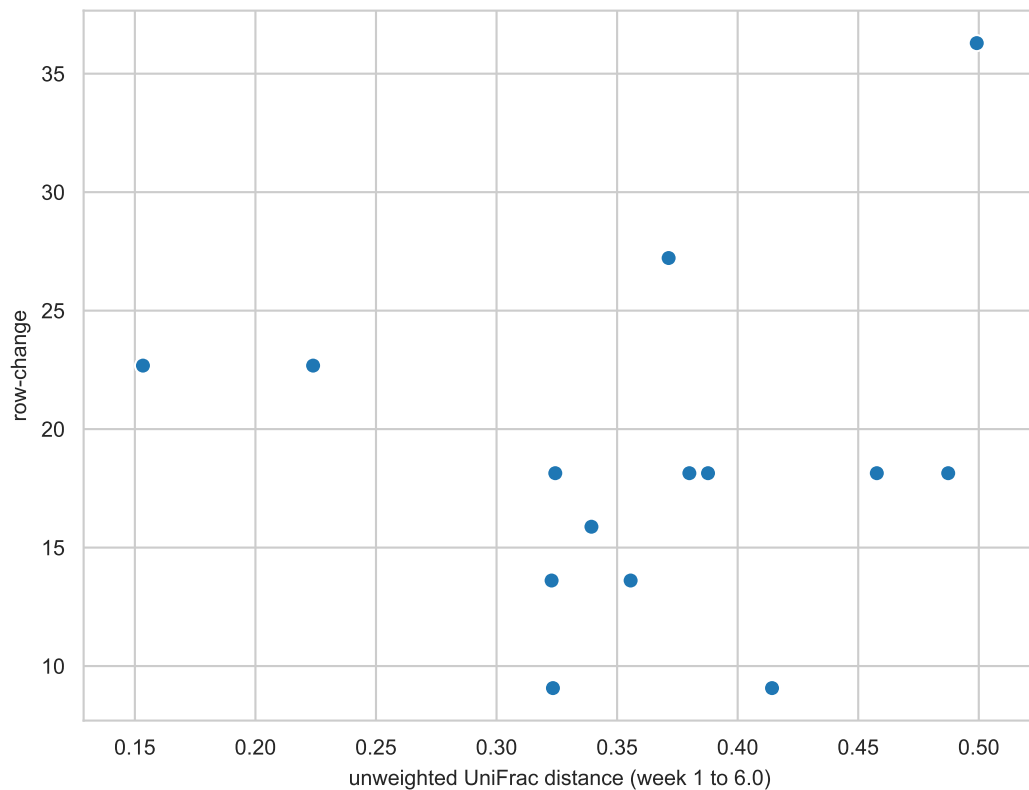

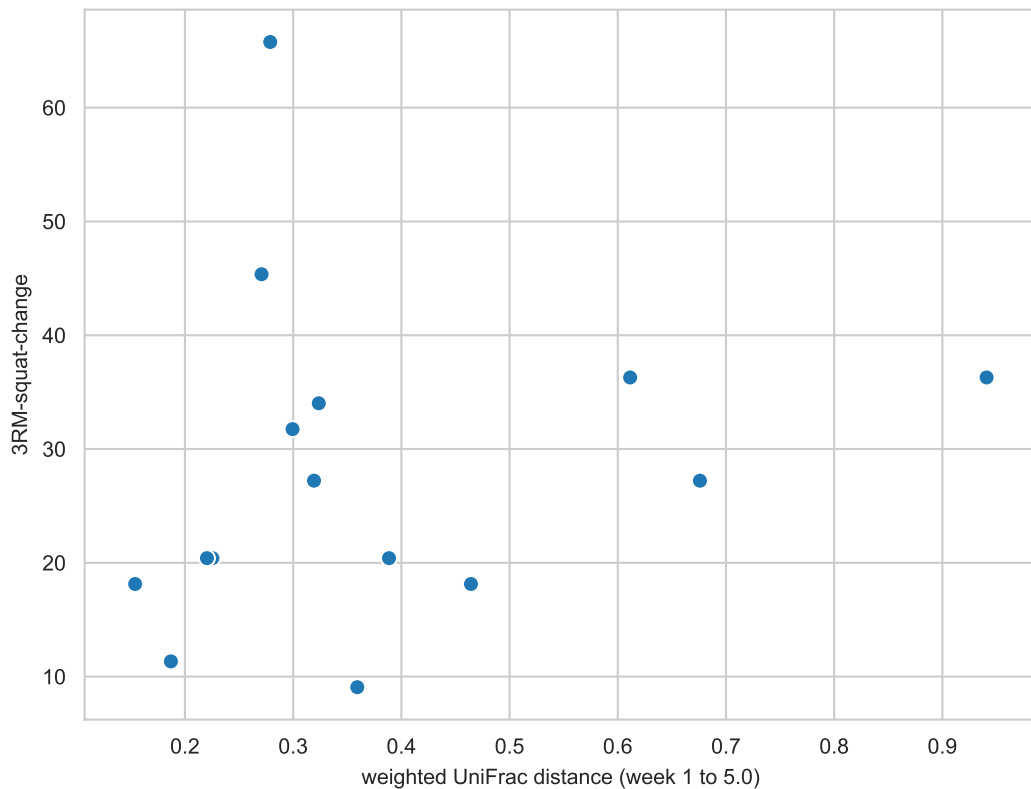

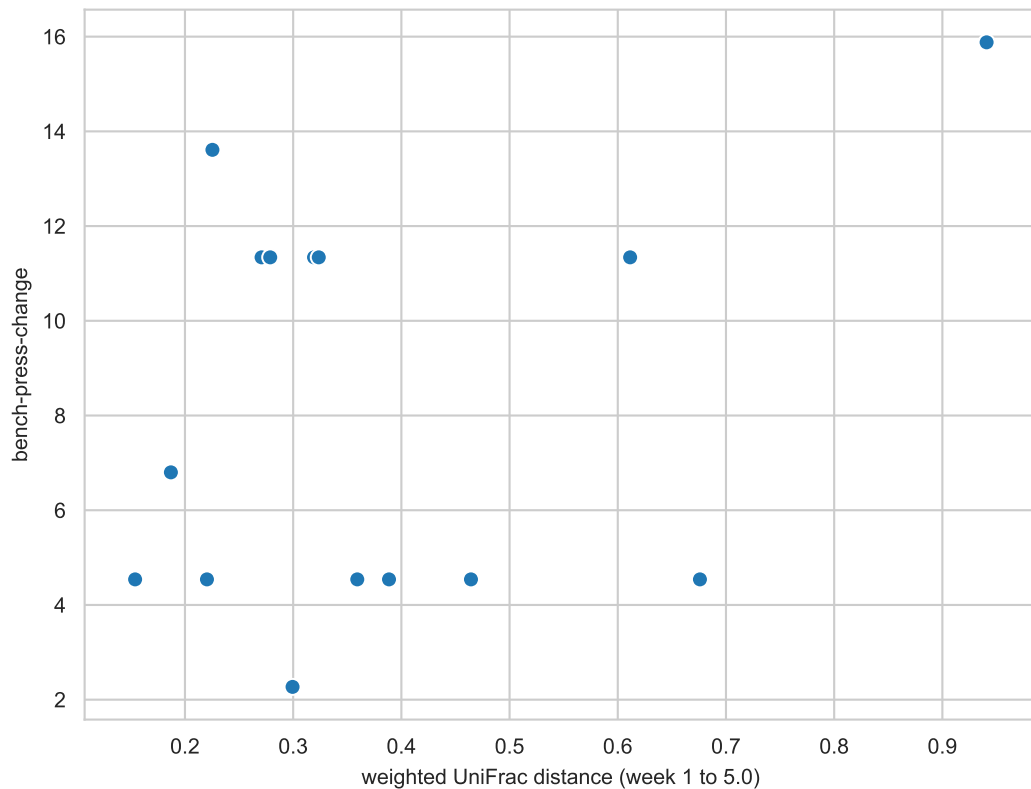

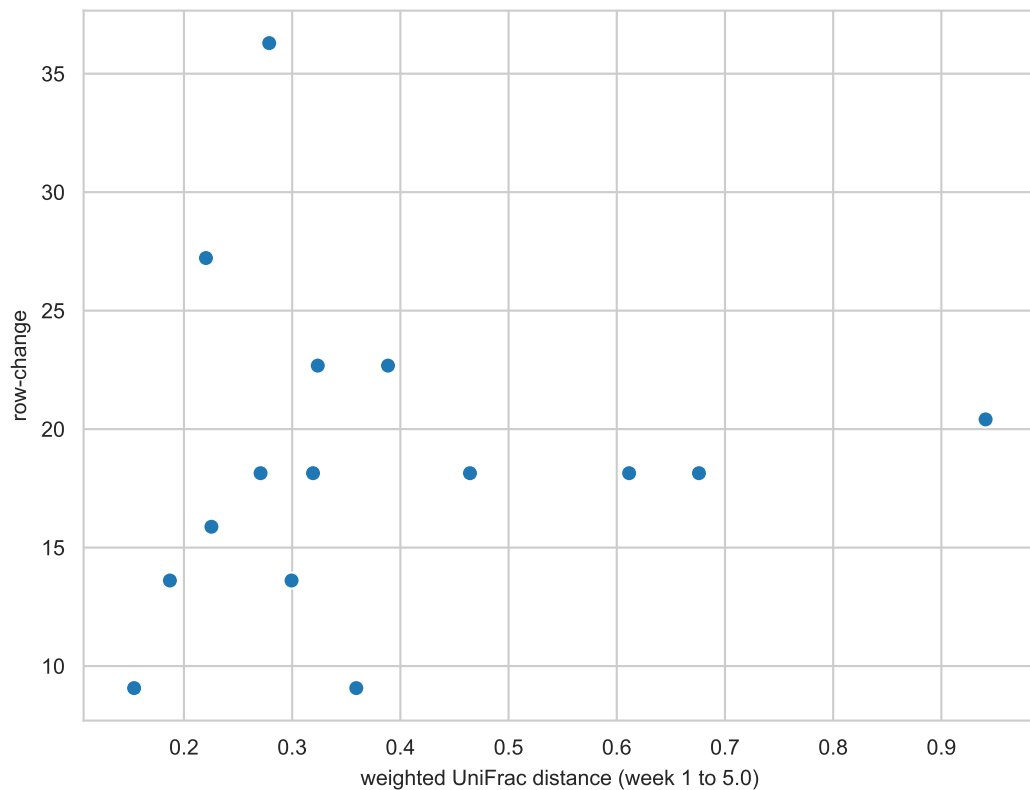

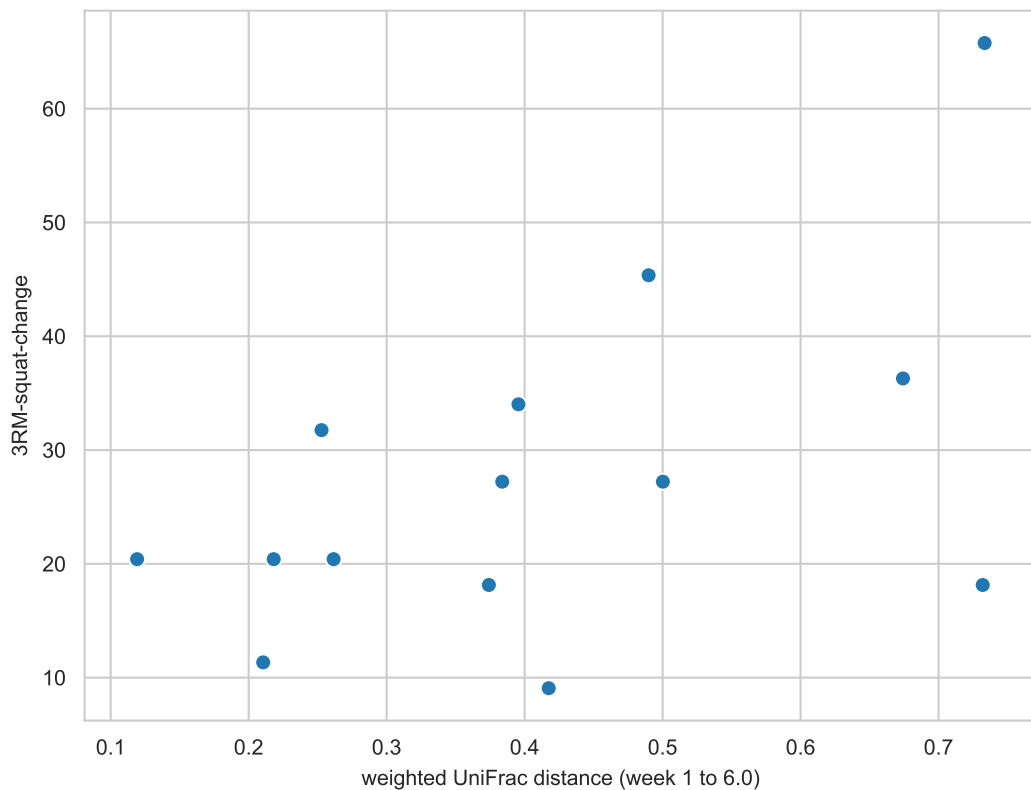

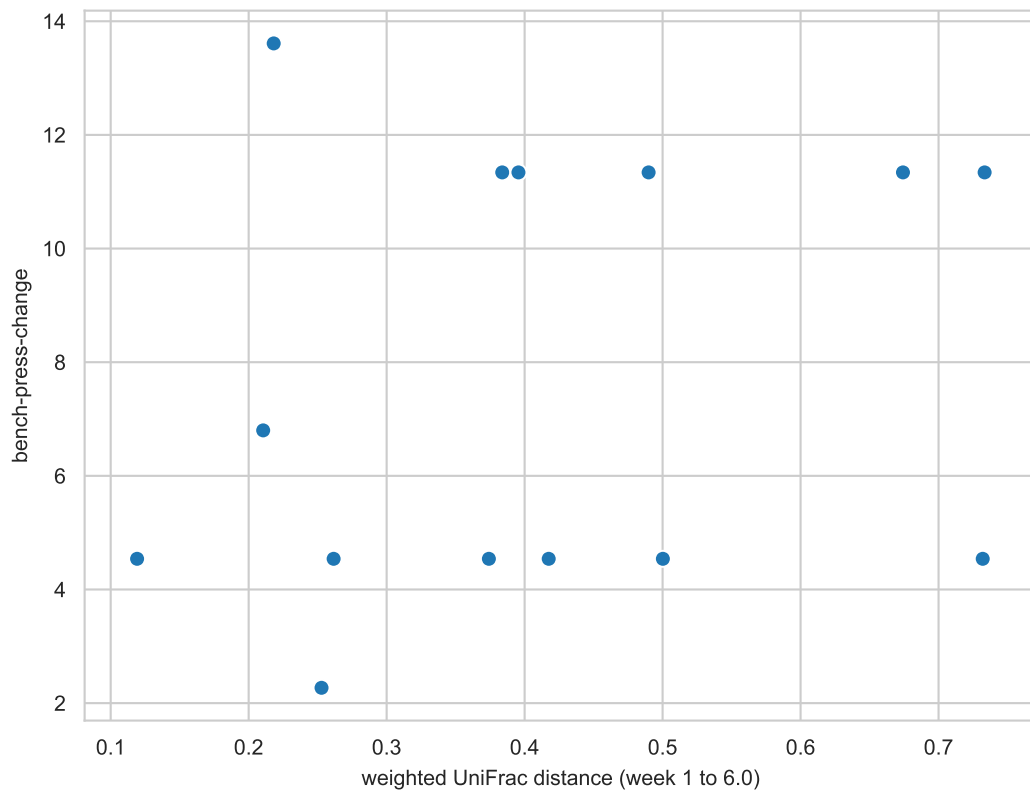

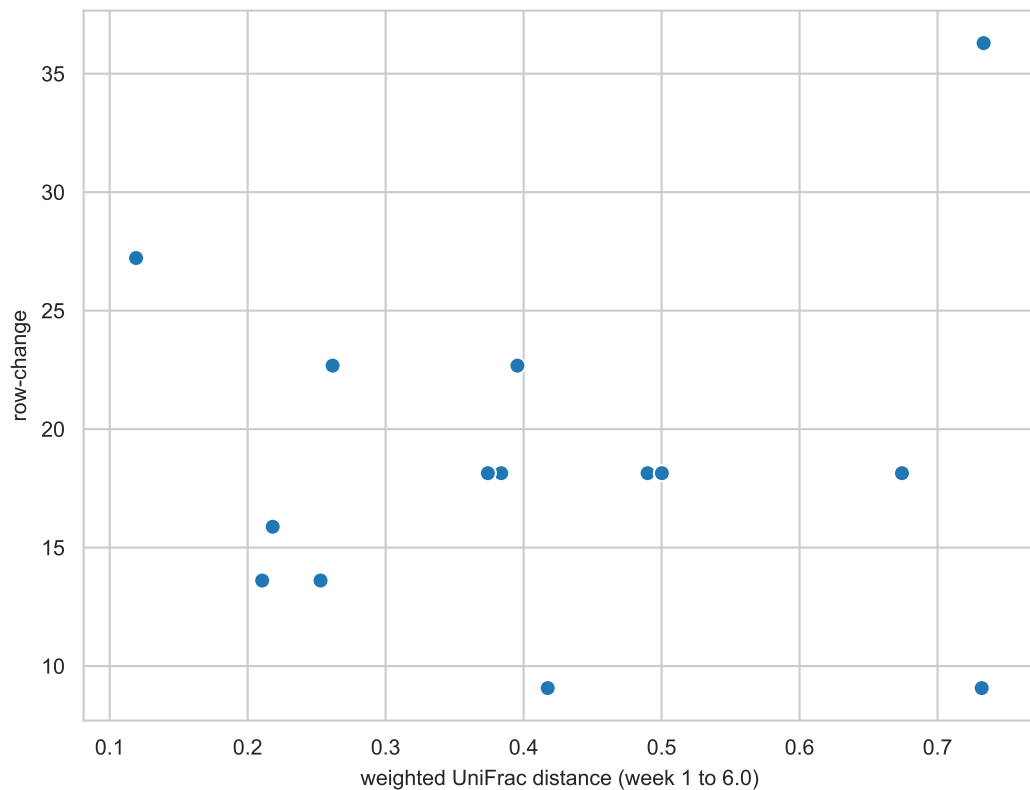

Supplement: s1 [file s1]
